1 **Selective translation of epigenetic modifiers drives the developmental clock of neural stem**  
2 **cells**

3 **Authors:** Quan Wu<sup>1\*</sup>, Yuichi Shichino<sup>2</sup>, Takaya Abe<sup>3</sup>, Taeko Suetsugu<sup>1</sup>, Ayaka Omori<sup>1</sup>, Hiroshi  
4 Kiyonari<sup>3</sup>, Shintaro Iwasaki<sup>2,4</sup>, Fumio Matsuzaki<sup>1,5\*</sup>

5  
6 **Affiliations:**

7 <sup>1</sup> Laboratory for Cell Asymmetry, RIKEN Centre for Biosystems Dynamics Research, Kobe,  
8 Hyogo 650-0047, Japan.

9 <sup>2</sup> RNA Systems Biochemistry Laboratory, RIKEN Cluster for Pioneering Research, Wako,  
10 Saitama 351-0198, Japan.

11 <sup>3</sup> Laboratories for Animal Resource Development and Genetic Engineering (LARGE), RIKEN  
12 Centre for Biosystems Dynamics Research, Kobe, Hyogo 650-0047, Japan.

13 <sup>4</sup> Department of Computational Biology and Medical Sciences, Graduate School of Frontier  
14 Sciences, The University of Tokyo, Chiba 277-8561, Japan.

15 <sup>5</sup> Laboratory of Molecular Cell Biology and Development, Department of Animal Development  
16 and Physiology, Graduate School of Biostudies, Kyoto University, Kyoto, Japan

17 \*Correspondence to: [quan.wu@riken.jp](mailto:quan.wu@riken.jp) and [fumio.matsuzaki@riken.jp](mailto:fumio.matsuzaki@riken.jp)

22 **Abstract:**

23 The cerebral cortex is formed by diverse neurons generated sequentially from neural stem cells  
24 (NSCs). A clock mechanism has been suggested to underlie the temporal progression of NSCs,  
25 which is mainly defined by the transcriptome and the epigenetic state. However, what drives  
26 such a developmental clock remains elusive. We show that translational control of histone H3  
27 trimethylation at Lys27 (H3K27me3) modifiers is part of this clock. We found that depletion of  
28 Fbl, an rRNA methyltransferase, reduces translation of both the Ezh2 methyltransferase and  
29 Kdm6b demethylase of H3K27me3 and delays progression of the NSC state. These defects are  
30 phenocopied by simultaneous inhibition of H3K27me3 methyltransferase and demethylase,  
31 indicating the role of Fbl in the genome-wide H3K27me3 pattern. Fbl selectively enhances the  
32 translation of H3K27me3 modifiers via a cap-independent mechanism. We thus propose that Fbl  
33 drives the intrinsic clock through the translational enhancement of H3K27me3 modifiers that  
34 predominantly define the NSC state.

35  
36 **Keywords:** brain development, embryonic neural stem cell, epigenetic state, temporal  
37 progression, developmental clock, translational regulation

38  
39  
40  
41  
42  
43  
44  
45  
46  
47  
48  
49  
50

51 **Main**

52 How the developmental schedule is shared by all individuals in a given species of animals is a  
53 fundamental question in developmental biology. One fascinating hypothesis is the presence of a  
54 developmental clock that counts time for the developmental program, and there are several  
55 potential mechanisms that could work in this manner. During somitogenesis, a clock consisting  
56 of a complex gene regulatory network generates oscillation and regulates segmentation in a  
57 defined time <sup>1</sup>. The cell cycle is also an oscillator that counts time to initiate transcription of the  
58 zygotic genome during the midblastula transition of *Xenopus* and *Drosophila* <sup>2,3</sup>. In  
59 oligodendrocyte precursors of rat optic nerve, an hourglass type clock was observed: an  
60 accumulated amount of a CDK inhibitor p27/kip1 during proliferation of oligodendrocyte  
61 precursors determines the timing for their differentiation <sup>4</sup>. Moreover, an epigenetic clock based  
62 on DNA methylation is a promising predictor of biologic age <sup>5</sup>.

63 Sequential generation of diverse neurons from a small population of neural stem cells  
64 (NSCs) in a highly orchestrated order in the mammalian cerebral cortex may also be controlled  
65 by a developmental clock. Following proliferation, NSCs divide asymmetrically to produce one  
66 stem cell and either a neuron or intermediate progenitor, the majority of which divide once  
67 before terminal differentiation <sup>6,7</sup>. As neurogenesis proceeds, a shift in NSC gene expression, or  
68 identity, occurs; thus, NSC identity is temporally patterned and initiates production of a diverse  
69 array of neuronal progeny. NSCs initially produce deep-layer (early-born) neurons, followed by  
70 upper-layer (late-born) neurons, and finally, glia <sup>8,9</sup>.

71 Temporal patterning of NSC identity is widely observed among species, from the central  
72 brain of *Drosophila*, to the mammalian retina, implying the existence of a conserved strategy for  
73 neuronal production <sup>8,10</sup>. In *Drosophila*, key temporal determinant genes have been identified,

74 and epigenetic mechanisms are involved in regulating these genes. For example, NSC expression  
75 of the *Hunchback* gene is epigenetically restricted by the relocation of the *Hunchback* locus into  
76 a repressive subnuclear compartment<sup>11</sup>. In the mammalian cortex, a set of temporal genes  
77 concordant with temporal identity progression have been identified<sup>10,12</sup>. Moreover, the  
78 perturbation of epigenetic modifier function has been shown to interrupt temporal patterning in  
79 mammalian NSCs. For example, perturbation of polycomb repressive complex 2, an epigenetic  
80 modifier of histone H3 trimethylation at Lys27 (H3K27me3), compromises temporal shifts in  
81 NSC identity, leading to disordered production of NSC progeny cells<sup>12-15</sup>. Thus, the precise  
82 temporal pattern of NSC gene expression largely depends on the precise control of temporal  
83 genome-wide epigenetic modifications. However, it remains unclear whether genome-wide  
84 epigenetic modification can work as a developmental clock to predict the temporal identity of  
85 NSCs, and if so, what factors drive this clock.

86

## 87 **Results**

### 88 **Dynamics of genome-wide H3K4me3 and H3K27me3 distribution during temporal** 89 **patterning of NSCs**

90 We first investigated temporal identity changes of NSCs by performing transcriptome analysis at  
91 the single-cell level from embryonic (E) day 11 (which is mostly proliferative or at the early  
92 neurogenic stage) to E14 (producing later-born neurons at the mid-neurogenic stage) (Fig. 1a).  
93 We then constructed a continuous trajectory of all cells including NSCs, neural progenitors, and  
94 neurons by a force-directed k-nearest neighbor graph using SPRING<sup>16</sup> and interpreted the cell  
95 clusters based on known markers (Fig. 1b and Extended Data Fig. 1a). Consistent with a  
96 previous model, NSCs gradually change their transcriptome to produce different types of

97 neurons<sup>10</sup>. We extracted early- and late-onset genes which showed higher expression level in E11  
98 and E14, respectively (Fig. 1c as examples; Extended Data Table 1a for the list).

99 To investigate the presence of an epigenetic clock that can predict temporal identity of  
100 NSCs, we first focused on two major histone modifications: histone H3 trimethylation at Lys4  
101 (H3K4me3) and H3K27me3, which is an active and repressive marker for gene expression,  
102 respectively, because temporal identity progression is accompanied with dramatic transcriptome  
103 change (Fig. 1b). We performed H3K4me3 and H3K27me3 chromatin immunoprecipitation and  
104 sequencing (ChIP-seq) using fluorescence-activated cell sorting (FACS)-sorted NSCs from  
105 *Hes1-d2-EGFP* reporter mice, in which d2-GFP is expressed under the control of the promoter  
106 of an established NCS marker: *Hes1*<sup>17</sup>, from E11, E12 and E14 (Fig. 1a). We then analyzed how  
107 histone modification changes associated with the temporal identity change of NSCs. We first  
108 analyzed the qualities of ChIP-seq data according to several criteria (Extended Data Fig. 1b-f).  
109 We subsequently classified each 200bp chromosome region at each stage into one of four states  
110 based on two histone modification profiles: H3K4me3-only, H3K27me3-only, bivalent, and no-  
111 marker. The majority of genomic regions gained or lost H3K27me3 modification when shifting  
112 from E11 to E14. In contrast, changes in ‘H3K4me3-only’ and ‘bivalent’ regions were restricted  
113 to relatively small genomic regions (Fig. 1d). We extracted 1505 and 20 sites showing  
114 significantly differential intensities (q-value < 0.05) of H3K27me3 and H3K4me3 peaks,  
115 respectively, between E11 and E14 NSCs (Fig. 1e,f; and Extended Data Table 1b). Then, we  
116 focused on changes in those early- and late-onset genes as described above. Whereas the  
117 abundance of H3K27me3 peaks on early-onset genes did not show a clear difference between  
118 E11 and E14, it was decreased at E14 compared to E11 in late-onset genes (Fig. 1g,h), implying  
119 that H3K27me3 represses the expression of late-onset genes in E11 NSCs (Fig. 1k for some

120 examples). On the other hand, the intensity of H3K4me3 peaks around the transcription start  
121 sites of early-onset genes was not drastically changed between E11 and E14 NSCs (Fig. 1i). In  
122 contrast, these peaks for late-onset genes increased from E11 to E14, reflecting the higher  
123 expression of these genes at E14 (Fig. 1j). Thus, we concluded that dynamic changes in  
124 H3K27me3 and H3K4me3 deposition on later-onset genes are associated with the temporal  
125 progression of NSCs.

126

### 127 **Global H3K27me3 pattern can predict the developmental time of NSCs**

128 To test whether genome-wide H3K4me3 and H3K27me3 patterns can predict developmental  
129 time of NSCs, we performed principle component analysis (PCA) based on the intensity of  
130 individual H3K27me3 and H3K4me3 peaks (methods in detail). H3K27me3 samples from  
131 different stages can be clearly separated and were deposited along a time axes, while H3K4me3  
132 samples were less distinguished especially for samples from E11 and E12 (Fig. 11,m). As  
133 H3K27me3 patterns are highly related to the developmental stage, we conclude that H3K27me3  
134 patterns within the genome can be considered as a part of the developmental clock in NSCs (Fig.  
135 1k).

136

### 137 **Identification of Fbl as a key regulator of temporal patterning**

138 We then asked what factors promote the developmental clock and lead to temporal identity  
139 transition of NSCs. We expected the presence of genes showing monotonic changes of  
140 expression among the factors promoting the temporal pattern. Therefore, we compared our single  
141 cell transcriptome data from E11 and E14 NSCs<sup>10</sup>. Using weighted correlation network analysis  
142 (WGCNA)<sup>18</sup>, we identified a gene module with higher expression in E11 than in E14 NSCs  
143 (brown module in Extended Data Fig. 2a) that was highly enriched in genes whose products are

144 located in nuclear regions essential for rDNA transcription and pre-rRNA processing, such as  
145 nucleolar part and fibrillar center (Fig. 2a,b; and Extended Data Table 2). Among these genes,  
146 *Fbl* (also known as *Fibrillarin*) is of particular interest. *Fbl* was initially reported as an rRNA  
147 methyltransferase for 2'-O-methylation and plays an essential role in development and disease<sup>19-</sup>  
148 <sup>22</sup>. Though *Fbl* is regarded as essential for the translational regulation of some mRNAs<sup>23</sup>, its role  
149 and underlying mechanisms in mouse brain development are unclear. To address these issues, we  
150 first investigated the expression pattern of *Fbl*. Ubiquitous expression of *Fbl* in both NSCs and  
151 neurons at E11 and E14 was observed by immunostaining (Fig. 2c and Extended Data Fig. 2b).  
152 Using western blot, we found higher *Fbl* protein levels in E11 than E14 FACS-isolated NSCs  
153 from *Hes1-d2-EGFP* reporter mice (Extended Data Fig. 2c,d).

154

### 155 **Knockout of *Fbl* disrupts brain development independently of apoptosis**

156 To examine *Fbl* function in NSCs, we conditionally deleted *Fbl* in the developing dorsal cortex  
157 from E9.5 by crossing with *Emx1-Cre* mice (*Fbl* CKO; Extended Data Fig. 2e). The CKO mice  
158 showed microcephaly and dramatic brain size reduction, and died around postnatal day (P) 40  
159 (Fig. 2e; and Extended Data Fig. 2f,g). Microcephaly in *Fbl* CKO could be induced by caspase-  
160 mediated apoptosis of NSCs, since earlier work reported upregulated *Trp53* expression and  
161 subsequent apoptosis in *Fbl* knock-down mouse embryonic stem cells<sup>24</sup>. Indeed, we detected  
162 high levels of cleaved caspase3 (CASP3) expression in E12.5 *Fbl* CKO brains (Extended Data  
163 Fig. 2h). To determine whether *Trp53*-dependent apoptosis is responsible for microcephaly, we  
164 crossed *Fbl* CKO and *Trp53*<sup>-/-</sup> mice. As *Trp53* knockout did not affect brain size, nor neuron  
165 number compared to wild type (Extended Data Fig. 3a-c), we used wild type or heterozygous  
166 mice for *Fbl* as controls (designated as *Fbl*<sup>+/+</sup> or *Fbl*<sup>Δ/+</sup> in Fig. 2d). We obtained double-knockout

167 mice with genotype *Fbl flox/flox*, *Trp53<sup>-/-</sup>*, *Emx1-Cre<sup>+/+</sup>* (DKO) in which we confirmed the loss  
168 of Fbl by immunohistochemistry (Extended Data Fig. 2i). We also detected several rRNA sites  
169 with reduced methylations upon *Fbl* deletion, consistent with previous study showing that Fbl is  
170 a methyltransferase of rRNA<sup>23</sup> (Extended Data Fig. 3d). DKO brains were smaller than control  
171 brains, although apoptosis was completely suppressed, indicating that microcephaly could not be  
172 explained by NSC apoptosis alone (Fig. 2e and Extended Data Fig. 2h).

173 We next tested the possibility that premature differentiation of NSCs and defective  
174 neurogenesis could cause microcephaly in *Fbl*-lacking mice by investigating DKO cortical  
175 organization at a late neurogenic stage (E17). Notably, we observed a significant decrease in the  
176 number of both deep-layer (*Tbr1<sup>+</sup>* or *Foxp2<sup>+</sup>*) and upper-layer neurons (*Satb2<sup>+</sup>*) in DKO brains  
177 compared with *Fbl<sup>+/+</sup>* or *Fbl<sup>Δ/+</sup>* mice using immunohistochemistry (Fig. 2f-h,j,k). Moreover, the  
178 cell population expressing *Brn2*, a crucial gene for the production of upper-layer neurons<sup>25</sup>, was  
179 also reduced in DKO brains (Fig. 2f,i). Additionally, we observed a significant reduction in the  
180 number of *Olig2<sup>+</sup>* oligodendrocytes and of cells expressing *Zbtb20*, which is essential for  
181 astrogenesis<sup>26</sup> in DKO mice (Extended Data Fig. 3e-g). If premature differentiation caused a  
182 decrease in neurons, the ratio of neurons to progenitors should be increased at late neurogenesis.  
183 However, this was not the case (Fig. 2j,l), indicating that the *Fbl*-deleted mouse cortex had  
184 defective neurogenesis that was not caused by premature NSC differentiation.

### 185 186 **Analysis of temporal identity of *Fbl*-mutant NSCs at single cell level**

187 To clarify the possible mechanisms leading to defective neurogenesis in DKO, we performed  
188 transcriptome analysis at the single-cell level for different genotypes along the developmental  
189 timeline (see methods for sample collection). Analysis of these transcriptome data using t-



190 distributed stochastic neighbor embedding (t-SNE) clustered the cells according to  
191 developmental time and cell type (Extended Data Table 3a). At E14, the DKO cells were clearly  
192 separated from *Fbl*<sup>+/+</sup> or *Fbl*<sup>Δ/+</sup> cells, but comparable to control cells at E10 or E12 (Extended  
193 Data Fig. 4a; and Extended Data Table 3b-d). We detected that differentially expressed genes  
194 (DEGs, fold change > 0.25, q-value < 0.01) between *Fbl*<sup>Δ/+</sup> and DKO NSCs (cells in cluster 0, 1,  
195 5, 7, 11, 12 in Extended Data Fig. 4b) increased from 41 (E10), to 74 (E12), and 760 (E14)  
196 (Extended Data Table 3b-d). These observations indicate that dramatic transcriptome changes  
197 occur in DKO NSCs compared to *Fbl*<sup>Δ/+</sup> control NSCs after E12.

198 Next, we investigated the properties of DEGs at E14. As we showed previously, NSCs  
199 gradually change their identity to produce different types of neurons (Fig. 3a). Consistent with  
200 this model, PCA organizes the cells from E11 and E14 dorsal brains into two directions: a  
201 differentiation axis (PC1) and a temporal axis (PC2) (Fig. 3b). We computed the contributions of  
202 each gene to PC1 and PC2, which represent the relevance of the gene to each axis (Extended  
203 Data Table 3e). Compared with randomly selected genes, the contribution of DEGs was  
204 significantly different in both PCs, suggesting that *Fbl* deletion affects both the differentiation  
205 and the temporal axis (Fig. 3c).

206 We then asked whether *Fbl* promotes or suppresses the progression of NSCs along these  
207 two axes. To answer this question, we again constructed a continuous trajectory of all cells with  
208 SPRING<sup>16</sup> (Extended Data Fig. 4c). The cells were thus deposited along the differentiation and  
209 temporal axes. Consistent with the t-SNE analysis, while DKO cells from E10 and E12 could not  
210 be distinguished from controls at the same stages, E14 DKO cells were closer to E12 *Fbl*<sup>Δ/+</sup> than  
211 to E14 *Fbl*<sup>+/+</sup> or *Fbl*<sup>Δ/+</sup> cells, implying delayed temporal identity transition (Fig. 3d).

212 To further confirm our results, we introduced a simple mathematical model to estimate  
213 the developmental time and differentiation state of each NSC (cells in cluster 0, 1, 5, 7, 11, 12 in  
214 Extended Data Fig. 4b; see methods). We defined the birthdate score and the differentiation  
215 score of each cell as a weighted linear combination of specific temporal-axis and differentiation-  
216 axis genes, respectively<sup>12</sup>. These scores are likely a faithful representation of each cell, as both  
217 birthdate and differentiation scores increased from E10 to E14. The birthdate scores of E14 DKO  
218 NSCs were lower than those of E14 *Fbl*<sup>+/+</sup> or *Fbl*<sup>Δ/+</sup> NSCs, but similar to those of E13 *Fbl*<sup>+/+</sup>  
219 NSCs (Fig. 3g). In addition, E14 DKO NSCs were less differentiated than E14 *Fbl*<sup>+/+</sup> or *Fbl*<sup>Δ/+</sup>  
220 (Fig. 3h). Pseudotemporal ordering of NSCs from these stages also suggested a delay of temporal  
221 patterning (Fig. 3e,f). Indeed, immunohistochemistry confirmed the persistence of an early-onset  
222 gene, *Dmrt3*, and delayed production of later-born neurons in the E14 DKO brains (Extended  
223 Data Fig. 4d-f). These results strongly suggest that *Fbl* is required for the proper temporal  
224 patterning of NCSs.

225

### 226 ***Fbl* affects cell cycle progression**

227 We next examined whether *Fbl* affects cell cycle progression by measuring the 5-ethynyl-2'-  
228 deoxyuridine (EdU) incorporation into NCSs. EdU pulse-labelling of S-phase cells for 1 h and  
229 immunostaining of M-phase cells with anti-phospho-histone 3 (pH3) antibody revealed  
230 significant reductions of both S-phase and M-phase cell populations in DKO at the E14  
231 compared to control (Fig. 4a-c). To further investigate this cell cycle defect, we analyzed DNA  
232 content of NSCs using FACS after siRNA-dependent *Fbl* knockdown (Fig. 4d,e). A significant  
233 increase in NSCs at the G1/G0 phase and a reduction of S-phase NSCs were observed 2 days  
234 after *Fbl* knockdown, suggesting that *Fbl* impacts S-phase initiation (Fig. 4f).

235 **Effect of Fbl on temporal identity transition is cell-autonomous**

236 The transition in NSC identity that promotes the shift to late-born neurons from early-born  
237 neurons requires feedback interaction between NSCs and early-born neurons<sup>27</sup>. However, if  
238 NSCs can receive the feedback from neighboring early-born neurons, the temporal pattern of  
239 these NSCs proceeds normally, even though their cell cycle is artificially arrested<sup>10</sup>. In the case  
240 of DKO, defects in temporal patterns might come from a compromised feedback from early-born  
241 neurons. We then examined how *Fbl*-deleted cells are affected in the presence of early-born  
242 neurons in two different conditions: sparse culture of *Fbl*-deleted cells with surrounding normal  
243 cells and *in vivo* *Fbl* deletion in a sparse population using CRISPR/Cas9. In both cases, *Fbl*-  
244 deleted cells produced less late-born neurons than control cells (Extended Data Fig. 5). These  
245 results indicate that defective Fbl cell-autonomously compromises temporal identity progression  
246 even in the presence of normal neighboring early-born neurons, where their feedback signal can  
247 proceed temporal pattern of NCS. As cell-cycle arrested NCSs can proceed with their temporal  
248 pattern due to feedback from neighboring neurons<sup>10</sup>, a cell-autonomous effect other than cell  
249 cycle defects appear to compromise the temporal pattern in Fbl-deficient NSCs.

250

251 **Fbl is essential for translation but not transcription of epigenetic modifiers**

252 We investigated how Fbl affects temporal identity progression in NSCs. Considering that Fbl is  
253 an rRNA methyltransferase, we tested whether *Fbl* knockout affects global protein synthesis by  
254 quantification of O-propargyl-puromycin (OPP) incorporation into nascent proteins (see  
255 methods). We found decreased levels of newly synthesized proteins in DKO NSCs (Extended  
256 Data Fig. 6a). To investigate whether Fbl affects the translation of selected mRNAs, we  
257 performed ribosome profiling<sup>28</sup> and RNA-seq using *Fbl*<sup>Δ/+</sup> and DKO brains (Fig. 5a).

258 Translational efficiency (TE) can be calculated by comparing the levels of translating mRNA  
259 (Ribo-seq) and total mRNA (RNA-seq). After analyzing the qualities of data according to several  
260 criteria (Extended Data Fig. 6b-d), we detected 299 and 541 genes with an increased and  
261 decreased TE (q-value < 0.01) in DKO brains, respectively (Fig. 5b,c; Extended Data Fig. 6e and  
262 Extended Data Table 4). Given that *Fbl* deletion reduced global levels of newly synthesized  
263 protein, we considered that mRNAs with a lower TE in DKO could be directly regulated by *Fbl*.  
264 Indeed, Gene Ontology (GO) analysis showed that genes involved in cell cycle progression, such  
265 as *Cdk1* and *Cdk6*, were listed in the ‘centrosome’ cluster as genes with a decreased TE in DKO  
266 (Fig. 5c, Extended Data Fig. 6f,g; and Extended Data Table 4), and hence cell cycle defects  
267 might be ascribed to a lower TE of those genes (Fig. 4). Strikingly, chromatin-related genes were  
268 highly enriched among those with a decreased TE in DKO, consistent with the roles of  
269 epigenetic modifications in temporal patterning<sup>29</sup> (Fig. 5c and Extended Data Table 4). Among  
270 these highly enriched genes were *Ezh2* and *Kdm6b*, which encode a methyltransferase and a  
271 demethylase, respectively, of H3K27me3 (Extended Data Fig. 6h,i). We found that *Kdm6b* and  
272 *Ezh2* protein levels were reduced without a concurrent decrease in mRNA levels, while protein  
273 and mRNA levels of NSC markers Pax6 and Sox2 were unaffected (Fig. 5d,e). This difference  
274 was not ascribed to protein stability (Extended Data Fig. 6j), thus we deduced *Fbl* to be  
275 selectively targeting protein translation.

### 276 277 ***Fbl* affects temporal patterning though H3K27m3 modification**

278 We investigated histone modification changes upon *Fbl* deletion in DKO and control samples  
279 (including NSCs and progenies; Fig. 6a) and demonstrated alterations of H3K27me3 and  
280 H3K4me3 modifications at 669 and 0 sites (q-value < 0.05), respectively, indicating significant

281 defects in H3K27me3 marks (Fig. 6b,c; and Extended Data Table 5a). Moreover, the abundance  
282 of H3K27me3 peaks on early-onset genes did not show a clear difference between control and  
283 DKO samples (Fig. 6d). In contrast, compared with control samples, the abundance of  
284 H3K27me3 peaks on early-onset genes (especially on transcription start sites) was higher in  
285 DKO samples, indicating the expression of these genes was repressed by H3K27me3 (Fig. 6e).  
286 Indeed, the expression of these genes were not upregulated in NSCs of E14 DKO (Extended  
287 Data Fig. 4d). To investigate whether H3K27me3 defects in DKO can represent the temporal  
288 identity delay, we plotted these H3K27me3 samples together with previous samples (in Fig. 1m)  
289 using PCA. E14 DKO and control samples were deviated from E14 NSCs in the PCA plot due to  
290 contamination of differentiated progenitors. However, as for the temporal direction, E14 DKO  
291 samples were not clustered with cells from E14 *Fbl*<sup>+/+</sup> nor *Fbl*<sup>Δ/+</sup>, but rather were close to E12  
292 NSCs, reflecting a delay of temporal identity progression (Fig. 6f).

293 Fbl control of both *Ezh2* and *Kdm6b* led us to questioning the role of modification  
294 turnover during temporal patterning. To this end, we inhibited both methyltransferase and  
295 demethylase using the specific inhibitors GSK-343 and GSK-J4, respectively, investigated gene  
296 expression changes involved in birthdate and differentiation, and calculated the birthdate and  
297 differentiation scores after RNA-seq. Inhibition of H3K27me3 methyltransferase or demethylase  
298 alone affected the expression of 210 and 409 genes, respectively (q-value<0.05); however, it did  
299 not dramatically affected birthdate and differentiation scores (Fig. 6g-l). In contrast, the  
300 simultaneous suppression of methyltransferase and demethylase affected the expression of 10056  
301 genes (q-value<0.05) and reduced both scores to levels similar to that of DKO brains, indicating  
302 delayed temporal fate progression (Fig. 6g-o; Extended Data Table 5b-e). Therefore, we

303 concluded that both writing and erasing of H3K27me3 are essential for temporal patterning, and  
304 that Fbl facilitates these processes by controlling the translation of key enzymes.

305

306 **Fbl selectively enhances the translation of targets genes though 5'UTRs in a cap-dependent**  
307 **manner**

308 Finally, we investigated how Fbl promotes the translation of target mRNAs. As the  
309 5'untranslated region (UTR) plays a critical role in translational regulation, we analyzed the  
310 5'UTRs of Fbl target mRNAs showing downregulated TE after *Fbl* deletion. Cap-independent  
311 translational initiation by RNA regulons such as internal ribosome entry site (IRES) elements  
312 can confer translational selectivity to specific mRNAs. IRES elements are characterized by the  
313 presence of poly (U) motif or a highly organized secondary structure<sup>30</sup>. The minimum free  
314 energy (MFE) of the 5'UTRs of Fbl target mRNAs was significantly lower than that of randomly  
315 selected mRNAs, suggesting that they were more structured (Fig. 7a). Moreover, a poly (U)  
316 motif was highly enriched in the 5'UTRs of these target mRNAs (31 genes; p-value= $10^{-56}$ , Fig.  
317 7b). Therefore, it is highly likely that the translation of Fbl target mRNAs is driven by a cap-  
318 independent mechanism in NSCs. To test this hypothesis, we constructed bicistronic reporters, in  
319 which cap-independent translational activity can be measured by the ratio between BFP and  
320 GFP, which are translated in a cap-dependent and a cap-independent manner, respectively (Fig.  
321 7c). As a positive control, we used the 5'UTR of *Cdkn1b*, which is a known cellular IRES<sup>31</sup>. We  
322 detected GFP signals by FACS when the 5'UTRs of *Cdkn1b*, *Kdm6b* and *Ezh2* were used.  
323 Knockdown of *Fbl* reduced these cap-independent translational activities, while BFP levels were  
324 not changed (Fig. 7d and Extended Data Fig. 7a-d). In contrast, only background level of GFP

325 signals was observed when the 5'UTR of *Pax6* was used, and the GFP signal did not depend on  
326 *Fbl* dosage (Extended Data Fig. 7a).

327 Furthermore, to uncover the role of *Ezh2* and *Kdm6b* 5'UTRs *in vivo*, we disrupted their  
328 5'UTRs in NSCs using CRISPR/Cas9 (Extended Data Fig. 7g,h), resulting in significantly  
329 reduced protein levels, with mRNA levels either slightly or not affected (Fig. 7e,f; Extended  
330 Data Fig. 7e,f). These results strongly suggest that *Fbl* enhances translation of these genes  
331 through 5'UTR. However, we could not confirm this 5' UTR mechanism as identical with well-  
332 known viral IRES, a cap-independent 5'UTR translation initiation, because *Ezh2* and *Kdm6b*  
333 could still be translated with a low efficiency in the absence of *Fbl* or 5'UTR (Fig. 5d; and  
334 Extended Data Fig. 7e,f).

335

## 336 Discussion

337 In this study, we showed that *Fbl* drives the H3K27me3-dependent developmental clock  
338 independent of cell cycle. As a simple model to measure developmental time, cell cycle number  
339 can perfectly predict the initiation of transcription from zygotic genome during early  
340 development of *Xenopus* (12 cycle) and *Drosophila* (10 cycle)<sup>2 3</sup>. However, many studies show  
341 that the developmental clock can work independent of cell cycle progression. As described  
342 before, p27/kip1 accumulation during proliferation is important for differentiation of  
343 oligodendrocyte precursors; however, slow down cell cycle progression of oligodendrocyte  
344 precursors by culture them in 33 °C rather than 37 °C does not affect differentiation process<sup>32</sup>.  
345 Moreover, during sequential expression of four temporal fate genes (*hunchback*, *Krüppel*, *pdm*  
346 and *castor*) in *Drosophila* neuroblasts, the *hunchback* to *Krüppel* transition required cytokinesis,

347 but the sequential expression of *Krüppel*, *pdm*, and *castor* is observed in the G2-arrest  
348 neuroblasts, indicating that their progression is independent of cell cycle <sup>33</sup>.

349 We observed both H3K4me3 and H3K27me3 peaks in the genomic region of early  
350 onset genes (Fig. 1g,i). This bivalent state is considered a mechanism for maintaining a potential  
351 for genetic activation <sup>34</sup>. This bivalent state of early-onset genes may also explain the plasticity  
352 of late NSCs, in which reprogramming of temporal identity has been reported after  
353 transplantation into young brains <sup>35</sup>. Unlike H3K4me3, we observed a dramatic gain and loss of  
354 H3K27me3 modification in NSCs between E11 to E14. Since H3K27me3 is highly associated  
355 with topologically associated domains and chromatin subcompartments <sup>36 37</sup>, this result strongly  
356 suggests that global chromatin organization, rather than repression of specific genes, is essential  
357 for temporal patterning of NSCs. Consistently, the simultaneous inhibition of methyltransferase  
358 and demethylase of H3K27me3, which mimics the *Fbl* loss-of-function phenotype, yielded much  
359 more DEGs (10056) than the linear addition of two inhibitors working separately (210 and 409,  
360 respectively; Extended Data Table 5).

361 Recently, 2'-*O*-methylation sites were found in mRNAs <sup>38,39</sup> where they inhibit  
362 translation elongation by slow tRNA decoding <sup>40</sup> rather than facilitating translation as found in  
363 this study. Thus, it is more likely that rRNA, rather than mRNA, modifications mediate the effect  
364 of *Fbl* on translation during brain temporal patterning. We hypothesized that rRNA modification  
365 by *Fbl* facilitates ribosomes to recognize or bind 5'UTR of target genes, thereby enhancing their  
366 translation (Fig. 8). In addition, it is likely that *Fbl* affects translation via the structure of 5'UTR  
367 of target mRNAs, which restricts the range of translational regulation, eventually generating the  
368 specificity of *Fbl* targets. Moreover, some ribosomal protein isoforms also have differential  
369 preferences for translation of specific mRNAs <sup>41</sup>. Indeed, scRNA data indicates that a subset of



370 ribosomal proteins showed higher expression in early compared to late NSCs (Fig. 2a)<sup>42</sup>.  
371 Therefore, ribosomal proteins and rRNA modification likely work coordinately to ensure the  
372 precise control of translation.

373 Why does epigenome-mediated temporal patterning utilize translational control by Fbl as  
374 an upstream mechanism to advance the developmental clock, in addition to transcriptional  
375 control of epigenetic factors? We speculate that selective translational promotion through 5'UTR  
376 is simple and efficient in ensuring the production of specific protein groups; the transcriptional  
377 upregulation of a group of genes often needs the cooperation of many epigenetic and  
378 transcription factors. Translational control of epigenetic modifiers by Fbl adds another level of  
379 complexity to gene expression, and thus, greatly widens the range of the epigenetic landscape,  
380 notably impacting diverse developmental processes and diseases.

381

382

## 383 **Materials and Methods**

### 384 **Animals**

385 All animal procedures were performed in accordance with the guidelines for animal experiments  
386 at RIKEN Center for Biosystems Dynamics Research.

387

### 388 **Mice**

389 To produce conditional knockout mice of *Fbl* (Accession No. CDB0137E:  
390 <http://www2.clst.riken.jp/arg/mutant%20mice%20list.html>), *loxP* sequences were introduced on  
391 both sides of *Fbl* locus by genome editing technology using CRISPR/CAS9 system in mouse  
392 zygotes. crRNA(CRISPR RNA), tracrRNA(trans-activating crRNA) and donor single-stranded  
393 oligodeoxynucleotides (ssODNs) consisting of a *loxP* site, an EcoRV recognition site and  
394 homology arms were chemically synthesized (Fasmac): 5'-crRNA ( 5'-  
395 AGCUUGUCUCAGGUUUAAACCGUUUUAGAGCUAUGCUGUUUUG -3'), 3'-crRNA (5'-

396 UCAAGGGCGCAUGCGUCUCGGUUUUAGAGCUAUGCUGUUUUUG-3') and tracrRNA (5'-  
397 AAACAGCAUAGCAAGUUAAAAUAAGGCUAGUCCGUUAUCAACUUGAAA  
398 AAGUGGCACCGAGUCGGUGCU-3'), 5'-*loxP* ssODN (5'-  
399 GTCCTCAGCACACAGCTTGTCTCAGGTTTAGATATCATAACTTCGTATAGCATAACATT  
400 ATACGAAGTTATACCTGGTTCCACATCACACCTGCCGCTGTT-3') and 3'-*loxP* ssODN  
401 (5'-  
402 CACACAAAGTTGATCAAGGGCGCATGCGTCATAACTTCGTATAATGTATGCTATACG  
403 AAGTTATGATATCTCGAGGCCACTTAGCAATAGGCACCAGACA-3'). The mixture of  
404 ssODNs, crRNAs, tracrRNA and Cas9 protein was injected into pronuclei of C57BL/6N zygotes  
405 by microinjection, and the injected zygotes were transferred into the oviducts of pseudopregnant  
406 ICR female mice. The resultant offspring were genotyped by genetic PCR with combination of  
407 following primers: 5'-*loxP* site: forward: 5'-CTCTTCTAGGACACTCCATCCCTTATCAAG-3';  
408 reverse: 5'-AGTACTAGTTGTGAAGGTATGAGAGGGGTC-3'; (wild type: 489 bp and 5'*loxP*:  
409 529 bp) 3'-*loxP* site: forward: 5'-GAAGAAGATGCAGCAGGAGAACATGAAGCC-3';  
410 reverse: 5'-CAACCAGCAAATGGCGACCACAACAAACC-3' (wild type: 575 bp and 3'*loxP*:  
411 615 bp). The insertions of *loxP* site were confirmed by the EcoRV digestion (5'-*loxP*: 292 bp and  
412 237 bp, and 3'-*loxP*: 360 bp and 255bp) and sequencing. The germline transmission of floxed  
413 allele in which 5'- and 3'-*loxP* sites were in the same allele was confirmed by crossing with  
414 C57BL/6. Production of *Trp53* mutant mice is described before <sup>43</sup>.

415 *Fbl* and *Trp53* mutant mice was maintained in C57BL/6 background. The reporter mouse line:  
416 *pHes1-d2-EGFP* (a gift from R. Kageyama <sup>17 44</sup>) was maintained in ICR background. Wild type  
417 mice used for inhibitors treatment and cap-independent translational activity tests were  
418 maintained in ICR background.

#### 419 420 **Weighted Gene Coexpression Network Analysis (WGCNA)**

421 WGCNA was performed using microarray data of E11 (n=24) and E14 (n=31) single cells <sup>10</sup>. We  
422 used top 10,000 genes after ranking of all genes by their expression level. Soft power parameter  
423 was set at three and dpSplt parameter was set as 0. Genes in the brown module were used to  
424 analyze protein interaction (<https://string-db.org>) and top10 nodes were identified by cytoHubba  
425 in Cytoscape <sup>45</sup>. Gene enrichment analysis was performed using Enrichr <sup>46</sup>.

## 426 **Immunohistology and confocal imaging**

427 Brains were fixed in 1% paraformaldehyde (PFA) overnight, treated by 25% sucrose for  
428 cryoprotection, and then embedded in OCT compound (Tissue-Tek; Sakura). Sections (12  $\mu$ m)  
429 were made using a cryostat (CM3050S Leica Microsystems). For immunostaining, sections were  
430 blocked with 3% skim milk powder in PBST (0.1% Tween20 in PBS) for 1 h at room  
431 temperature (RT), followed by incubation with primary antibody in the optimized concentration  
432 at 4 °C. According to primary antibodies, sections were then incubated with secondary antibodies  
433 with labelled fluorescent probes (1:400) (Alexa Flour 488, cy3, or 647; Jackson  
434 ImmunoResearch) for 90 min at RT. DAPI was used for nuclei detection. A scanning confocal  
435 microscope (Olympus FV1000 or Zeiss LSM 880 with Airyscan) was used for observation. For  
436 Tbr2/EOMES staining, the antibody (rat monoclonal, clone Dan11mag; eBioscience at Thermo  
437 Fisher) has been conjugated with eFluor660. The primary antibodies were: Fibrillarin (rabbit  
438 polyclonal, ab5821, abcam), Cleaved Caspase-3 (Asp175)(rabbit polyclonal, 9661S, Cell  
439 Signaling Technology), Satb2 (mouse monoclonal, ab51502, abcam), Tbr1 (rabbit polyclonal,  
440 ab31940, abcam), Olig2 (goat polyclonal, AF2418, R&D System), Pax6 (rabbit polyclonal,  
441 PRB-278P, Covance), Sox2 (goat polyclonal, sc-17320, Santa Cruz), GFP (chick polyclonal,  
442 GFP-1020, aves), Phospho-Histone H3 (Ser10) (rabbit polyclonal, 06-570, Millipore), Brn-2  
443 (goat polyclonal, sc-6029, Santa Cruz), FoxP2 (goat polyclonal, sc-21069,, Santa Cruz), Zbtb20  
444 (Rabbit polyclonal, HPA016815, Sigma) and Dmrt3 (rabbit polyclonal, a gift from D. Konno) <sup>47</sup>.

445

## 446 **Western blot analysis**

447 Pierce® IP lysis buffer (Thermofisher Scientific) was added into the collected dorsal cortices or  
448 the FACS-sorted cells. After sonication (TOMY HandySonic, 10s at level 4), lysate was  
449 centrifuged at 13,000 g for 10 min. The supernatant was mixed with 1  $\mu$ l of protease inhibitor  
450 cocktail (nacalai tesque). After mixing with same volume of sampling buffer laemmli (Sigma),  
451 the supernatant was boiled at 98 °C for 5 min, applied to SDS page gel (SuperSep, WAKO) and  
452 transferred onto a 0.2  $\mu$ M nitrocellulose blotting membrane (GE Healthcare). After incubation  
453 with blocking buffer (5% milk in tris-buffered saline with 0.1% Tween20) at RT for 1 h, the  
454 membrane was incubated with primary antibody overnight at 4 °C, followed by the incubation  
455 with anti-rabbit or anti-mouse IgG antibody conjugated to horseradish peroxidase (NA934V or  
456 NA931V, GE Healthcare). After reactivation with Chemi-Lumi One Ultra (nacalai tesque),

457 images were obtained by LAS3000 mini imaging system (Fujifilm). The intensity of the bands  
458 was calculated by ImageJ (1.52d). The primary antibodies were: Ezh2 (mouse monoclonal,  
459 5246S, Cell Signaling Technology), Pax6 (rabbit polyclonal, PRB-278P, Covance), Histone H3  
460 (rabbit monoclonal, 4499, Cell Signaling Technology), Kdm6b (rabbit polyclonal, NBP1-06640,  
461 Novus Biologicals), Sox2 (rabbit polyclonal, ab75179, Abcam), Fibrillarlin (rabbit polyclonal,  
462 ab5821, Abcam) and  $\alpha$ -tubulin (mouse monoclonal, clone DM1A, T9026, Sigma-Aldrich).

463

#### 464 **Plasmid, stealth siRNA and gRNA**

465 Stealth siRNA for *Fbl* and control was designed with BLOCK-iT™ RNAi Designer  
466 (<https://rnaidesigner.thermofisher.com/rnaiexpress/>) as following: *Fbl* siRNA: 5'-  
467 CCGCAUCGUCAUGAAGGUGUCUUUA-3' and control siRNA: 5'-  
468 CCGGCUACUAGUGGAUGUCCAUA-3'.

469 To construct reporter of cap-independent translational activity, sequence of mtagBFP, 5'UTR of  
470 test genes and EGFP were inserted into pCAG-FLAG-N1 plasmid<sup>48</sup> using In-Fusion HD  
471 Cloning Kit (TAKARA).

472 The *pHes5-d2-EGFP* plasmid used in cell cycle analysis was a gift from R. Kageyama<sup>17 44</sup>.

473 The target region of gRNA for knockout of *Fbl* and *Trp53* was showed below: *Fbl* gRNA1: 5'-  
474 CCACCATGCGGCATGCTGGAATT-3'; *Fbl* gRNA2: 5'-  
475 CCTCGAGACGCATGCGCCCTTGA-3'; *Trp53* gRNA1: 5'-  
476 CCTCGCATAAGTTTCCTGAAATA-3'; *Trp53* gRNA2: 5'-  
477 CAGCAGGTGTGCCGAACAGGTGG-3';

478 The target region of gRNA for knockout of 5'UTR of *Ezh2* and *Kdm6b* was showed below:

479 *Ezh2* gRNA set1\_1: 5'-GGGTTGCTGCGTTTGGCGCTCGG-3'; set1\_2: 5'-  
480 CCGTCCGCGCCCGGTGGTCCGCA-3'; *Ezh2* gRNA set2\_1: 5'-  
481 CCGTCCGCGTCCGACACCCAGTG-3'; set2\_2: 5'-GAGAGGCGCGGGCTGGCGCGCGG-3'.  
482 *Kdm6b* gRNA set1\_1: 5'-CCCTCAGGTCGGCTCGTGAATGG -3' set1\_2: 5'-

483 CCCACTTGCGCGATTCTAGGGGC-3'. Primers for production of gRNA were designed  
484 following<sup>49</sup>. Designed primers were self-amplified by PCR and PCR fragments were inserted  
485 into AflII cut gRNA vectors modified from Church Lab<sup>50</sup>.

486 All plasmids were purified with endotoxin-free NucleoBond Xtra Midi EF kit (Macherey-  
487 Nagel).

488 **EDU staining**

489 Pregnant mice were injected intraperitoneally with EdU (Invitrogen) at 12.5 mg/kg. EdU staining  
490 was performed with Click-iT EdU Imaging kit (Invitrogen).

491  
492 **Single cell isolation and library construction**

493 To isolated *Hes1* positive neural stem cells (NSCs) at E14, dorsal cortices were dissected from  
494 *Hes1-d2-EGFP<sup>Tg/+</sup>* mice. Cortices were dissociated with 0.05% trypsin with Hanks'Balanced Salt  
495 Solution (HBSS) (-) at 37 °C for 10 min. After centrifugation at 1000 g for 5 min, cells were  
496 resuspended with 0.375% BSA/HBSS(-) by gentle pipetting 15 to 20 times. Resuspended cells  
497 were filtered with 35 µm filter (Falcon) and sorted into sorting buffer (20 ng/ml human basic  
498 FGF (Peprotech), 1XB27 RA- (Gibco), in Dulbecco's Modified Eagle Medium (DMEM)  
499 F12+GlutaMax (Gibco)) by a cell sorter (SH800, SONY) equipped with 130 µm sorting chips  
500 (SONY, LE-C3113). After sorting, cell number was counted by Countess or Countess II  
501 (Invitrogen). For cells from wild type and *Fbl* mutant mice, cells were collected similarly except  
502 that sorting was not performed.

503 Collected cells were immediately load into the 10X-Genomics Chromium (10X Genomics,  
504 Pleasanton, CA). Libraries for single cell cDNA were prepared using Chromium 3' v2 platform  
505 as the manufacturer's protocol.

506

507 **Bioinformatics analysis of single cell data**

508 Sequenced data was mapped to mm10 and cell number and raw count for each gene were  
509 reported by cellranger 2.0.2 (10X GENOMICS). All data were further analyzed by a  
510 bioinformatics pipeline Seurat (2.3.4)<sup>51</sup>. Briefly, we first created a SeuratObject, in which genes  
511 that were expressed by less than 3 cells and cells that expressed less than 200 genes were  
512 removed. Number of unique molecular index (UMI) were automatically counted by Seurat. We  
513 calculated percentage of UMI mapping to mitochondrial genes and used these values to further  
514 filter cells (<15%). Data were then normalized ((normalization.method = "LogNormalize",  
515 scale.factor = 100000) and scaled (vars.to.repress=c("UMI","percent.mito")). Then, principal  
516 component (PC) analysis were performed and top 10 PCs were used for t-Distributed Stochastic  
517 Neighbor Embedding (t-SNE) dimensional reduction. TSNEPlot and FindAllMarkers was used  
518 to visualize clusters and to investigate the cell type of each cluster, respectively.

## 519 **Pseudotemporal ordering**

520 To order NSCs pseudotemporally, monocle (2.10.1) package was used<sup>52</sup>. NSCs were extracted  
521 based on t-SNE clustering (Cluster 0, 1, 5, 7, 11, 12 in Extended Fig. 4b). NSCs were manually  
522 clustered into early NSCs and later NSCs according to the expression level of *Hmga2* (>2) and  
523 *Dbi* (>15). Then, these cells were ordered by DDRTree method according 200 differential  
524 expression genes between these two clusters.

525

## 526 **Calculation of birthdate and differentiation score**

527 To evaluate temporal identity and differentiation state of each cell, we used core genes to  
528 calculate birthdate and differentiation score as previous reported<sup>12</sup>. Briefly, authors used ordinal  
529 regression models to predict birthdate and differentiation state of each cell. The best 100 genes  
530 based on the linear weight of the models was selected for prediction. We used 95 genes (5 of  
531 them could not be detected in our system including Rp23-379c24.2, Leprel1, Rp23-14p23.9,  
532 Mir99ahg and Yam1) and 100 genes for calculation of birthdate and differentiation score by  
533 following formula:

$$534 \text{ Birthdate score} = \sum_{i=1}^{95} W_{bi} * E_{bi}$$

$$535 \text{ Differentiation score} = \sum_{i=1}^{100} W_{di} * E_{di}$$

536  $W_{bi}$  and  $E_{bi}$  indicates weight of each temporal-related gene and its expression level in each cell,  
537 respectively.  $W_{di}$  and  $E_{di}$  indicates weight of each differentiation-related gene and its expression  
538 level in each cell, respectively.

539

## 540 **Ribosome profiling**

541 Ribosome profiling protocol was modified from previous study<sup>53</sup>. Briefly, E14 dorsal cortices  
542 were dissected and removed into a 1.5 ml tube. Then, 200  $\mu$ L and 100  $\mu$ L (in the case of *Fbl* <sup>$\Delta$ /+</sup>  
543 and DKO cortices, respectively) ice-cold lysis buffer (20 mM Tris-HCl (pH 7.5), 150 mM NaCl,  
544 5 mM MgCl<sub>2</sub>, 1 mM DTT, 100  $\mu$ g/ml cycloheximide, and 1% Triton X-100) was added. Tissues  
545 were lysed by pipetting and these lysates were incubated with 15 U of TURBO DNase  
546 (Invitrogen) for 10 min on ice. Supernatants were collected after centrifugation at 20,000g for 10  
547 min at 4 °C. The Qubit RNA HS Assay Kit (Thermo Fisher Scientific) was used to measure the

548 RNA concentration. Supernatants containing 400 ng RNA was treated with 0.8 U of RNase I for  
549 45 min at 25 °C. Then, same process was performed as previously described<sup>53</sup>. To remove  
550 rRNAs from the total RNA, the Ribo-Zero Gold rRNA Removal Kit (Human/Mouse/Rat)  
551 (Illumina) was used.

552

### 553 **Ribo-seq and RNA-seq analysis**

554 Sequence data from RNA-seq and ribosome profiling were trimmed with Trim Galore! (--  
555 phred33 -q 30 --length 35) ([https://www.bioinformatics.babraham.ac.uk/projects/trim\\_galore/](https://www.bioinformatics.babraham.ac.uk/projects/trim_galore/)).  
556 Cutadapt (<https://cutadapt.readthedocs.io/en/stable/guide.html>) was used to remove universal  
557 adaptors and linker sequences. Reads were then mapped onto mouse genome mm10 using hisat2  
558 (2.1.0)<sup>54</sup> and rRNA was removed from mapped reads. Duplicates were marked and removed  
559 with Picard (<https://broadinstitute.github.io/picard/>). For Ribo-seq, Ribodiff<sup>55</sup> was used to count  
560 reads and genes which have more than 10 counts in ribo-seq (11370 genes) were used to detect  
561 genes with different translational efficiency. For RNA-seq, stringtie (1.3.6)<sup>56</sup> was used to  
562 identify differentially expressed genes between experiments and the result was further analyzed  
563 by TCC (1.22.1)<sup>57</sup>.

564

### 565 **Chromatin immunoprecipitation (ChIP) analysis**

566 Cells were either FACS-sorted from E11, E12 and E14 *Hes1-d2-EGFP<sup>TG/+</sup>* mice or from E14  
567 cortices of control (*P53<sup>-/-</sup> Emx1<sup>Cre/+</sup>*, *Fbl<sup>fllox/+</sup> P53<sup>-/-</sup>* and *Fbl<sup>fllox/fllox</sup> P53<sup>-/-</sup>*), heterozygotes  
568 (*Fbl<sup>fllox/+</sup> P53<sup>-/-</sup> Emx1<sup>Cre/+</sup>*) and DKO (*Fbl<sup>fllox/fllox</sup> P53<sup>-/-</sup> Emx1<sup>Cre/+</sup>*). The number of cells was counted  
569 as described above. These cells were fixed with 0.25% PFA in PBS for 10 min at RT, washed  
570 with 0.1 M glycine in PBS for three times. These cells were collected after centrifugation at 1500  
571 g for 5 min. After remove of supernatant, these cells were resuspended with ChIP buffer (10 mM  
572 Tris-HCl pH 8.0, 200 mM KCl, 1mM CaCl<sub>2</sub>, 0.5% NP40) at the concentration of 1X10<sup>6</sup> cells/ml.  
573 After a brief sonication (TOMY HandySonic, 10 s, level 10), micrococcal nuclease  
574 (Worthington) was added at the concentration of 50 U/ml. The mixer was incubated at 37 °C for  
575 20 min. EDTA (final concentration: 10mM) was added to stop MNase reaction. The lysates were  
576 collected after centrifugation at 15000 g for 5 min and supernatants were removed. The lysates  
577 were resuspended with RIPA buffer (50 mM Tris-HCl pH 8.0, 150 mM NaCl, 2mM EDTA, 1%  
578 NP40, 0.5% Sodium Deoxycholate, 0.1% SDS). After sonication for three times (10 s, level 10),

579 lysates were centrifuged at 15,000 g for 5 min and supernatants were collected. For each ChIP  
580 experiment, 100  $\mu$ L lysate was used. 25  $\mu$ L Dynabeads-Anti Rabbit or Mouse IgG (Invitrogen)  
581 were washed with 500  $\mu$ L ChIP buffer. Beads were incubated with 1  $\mu$ L of primary antibody  
582 H3K27me3 (rabbit monoclonal, Cell Signaling Technology, #9733) and H3K4me3 (monocle,  
583 wako, 307-34813) in 300  $\mu$ L blocking buffer (5 mg/ml BSA, 0.5% NP40, 0.1% Tween20 in  
584 PBS) at 4 °C with gentle rotation overnight. After wash with ChIP buffer three times, those  
585 beads were mixed with 400  $\mu$ L blocking buffer and 100  $\mu$ L ChIP lysate and incubated for 1 h at  
586 4 °C. These beads were washed five time with low salt wash buffer (20 mM Tris-HCl pH 8.0,  
587 150 mM NaCl, 2mM EDTA, 1% Triton-X100 and 0.1% SDS) and high salt wash buffer (20 mM  
588 Tris-HCl pH 8.0, 500 mM NaCl, 2 mM EDTA, 1% Triton-X100 and 0.1% SDS), respectively,  
589 followed by the release of chromatin by incubation of these beads with 200  $\mu$ L elution buffer (50  
590 mM Tris-HCl pH 8.0, 10 mM EDTA and 1% SDS) for 30 min at 65 °C. The supernatant was  
591 removed into a new tube and was incubated at 65 °C for 4 h. 1  $\mu$ L RNase A (Sigma) was added  
592 and incubate at 37 °C for 10 min to degrade RNA. The supernatant was incubated at 55 °C  
593 overnight with 5  $\mu$ L proteinase K (Roche). Genomic DNA was extracted with phenol:chloroform  
594 extraction.

595

### 596 **Bioinformatics analysis of ChIP data**

597 Sequenced reads with poor quality were trimmed with Trim Galore! (--phred33 -q 30 --length  
598 35) ([https://www.bioinformatics.babraham.ac.uk/projects/trim\\_galore/](https://www.bioinformatics.babraham.ac.uk/projects/trim_galore/)). Reads were mapped  
599 onto mouse genome mm10 using bowtie<sup>58</sup> with the parameter -m1 --best --strata. Mapped sam  
600 files were transferred into bam files and were sorted with samtools (1.5)<sup>59</sup>. Duplicates were  
601 marked and removed with Picard (<http://broadinstitute.github.io/picard/>). Peaks of ChIP-seq  
602 were called using MACS2 (2.1.1)<sup>60</sup>. Q-value to cutoff H3K4me3 peaks was set at 0.01. For call  
603 peaks of H3K27me3 --broad function was used and q-value was set at 0.01 and 0.05 to cutoff  
604 narrow/strong regions or broad/weak regions, respectively. For each sample, specified input was  
605 used as control.

606 Deeptools (3.2.1)<sup>61</sup> was used to calculation the correlation of each data set. The alignment files  
607 were binned using multiBamSummary function with default setting and pearson correlation was  
608 calculated using plotCorrelation function. To confirm the quality of our ChIP-seq data, we also  
609 compared our H3K4me3 and H3K27me3 ChIP-seq using E14 NSC with the published



610 H3K4me3 (ENCSR172XOZ) and H3K27me3 (ENCSR831YAX) ChIP-seq data using E14  
611 forebrain (<https://www.encodeproject.org/>).

612 ChromHMM (1.14)<sup>62</sup> was used to evaluate state transition between different stages. The  
613 alignment files of H3K4me3 and H3K27me3 in each stage were binned into 200-bp bins using  
614 BinarizeBam. Then, we established the model with 4 emission states (H3K4me3-only,  
615 H3K27me3-only, bivalent and none) and trained with binned data using LearnModel command.  
616 These segmentation files with state information was used to plot alluvial plotting.  
617 DiffBind package (2.10.0)<sup>63</sup> in R was used to find peaks with different intensity between  
618 samples and different stages and to visualize data with PCA. To do so, overlapping peaks among  
619 each samples were isolated and sequenced reads on these consensus peaks were counted using  
620 dba.count function. As a result, a matrix in which each column indicates a consensus peak and  
621 each row indicates the normalized reads counting was produced. The matrix was used to plot  
622 PCA using ggplot function in R. The peaks with different intensity was calculated using  
623 dba.contrast and dba.analyze function. MA plotting was draw by dba.plotMA function.  
624 Circos plot was generated by Circos tool<sup>64</sup> using H3K27me3 peaks showing different intensity  
625 between E11 and E14 NSCs.

626

### 627 **Library preparation and sequencing**

628 Library preparation for RNA-sequencing (RNA-seq) was performed as described<sup>65</sup> using the  
629 TruSeq Stranded mRNA Library Prep Kit (Illumina) and 100-110 ng of total RNA. Library  
630 preparation for ChIP-sequencing (ChIP-seq) was performed as described<sup>66</sup> using the KAPA LTP  
631 Library Preparation Kit (KAPA Biosystems) and 2 ng of input DNA, or the entire amount of the  
632 ChIP DNA obtained. KAPA Real-Time Library Amplification Kit (KAPA Biosystems) was used  
633 in conjunction with the library preparation kits described above to minimize the number of PCR  
634 cycles for library amplification. Library preparation for single-cell RNA-seq (scRNA-seq) was  
635 performed following the standard protocol of the 10x Genomics Chromium Single Cell 3' v2 Kit  
636 (10x Genomics). Sequencing was performed in HiSeq1500 (Illumina) with the HiSeq SR Rapid  
637 Cluster Kit v2 (Illumina), the HiSeq PE Rapid Cluster Kit v2 (Illumina), or the TruSeq PE  
638 Cluster Kit v3-cBot-HS, to obtain single-end 80 nt reads for RNA-seq and ChIP-seq libraries, or  
639 paired-end 26 nt (Read 1)- 98 nt (Read 2) reads for scRNA-seq libraries. Total reads of each  
640 sample were reviewed in Extended Data Table 6.

641 **Primary cell culture**

642 For knockdown experiment, cells from E11 dorsal cortices were counted and resuspended with  
643 buffer R (Neon™ transfer system, Invitrogen) in the concentration of  $8 \times 10^6$  cells/ml.  
644 Resuspended cells (100  $\mu$ L) were mixed with 160  $\mu$ M control or *Fbl* siRNA. Electroporation  
645 was performed with Neon (Neon™ transfer system, Invitrogen) at condition of 1600 voltage, 20  
646 width and 1 pulse. These transfected cells were mixed with 2 ml culture medium (20 ng/ml  
647 human basic FGF (Peprotech), 1XB27 RA- (Gibco), in Dulbecco's Modified Eagle Medium  
648 (DMEM) F12+GlutaMax (Gibco)) and distributed into 4 well or 24 well-plates (500  $\mu$ l/well) and  
649 cultured at 37 °C. For inhibitors treatment,  $2 \times 10^5$  cells/well were culture in the DMSO, 2.5  $\mu$ M  
650 GSK-J4 (Sigma, SML0701), 2.5  $\mu$ M GSK-343 (Sigma, SML0766) or 2.5  $\mu$ M GSK-J4 and 2.5  
651  $\mu$ M GSK-343 for 3 days.

652 For test cap-independent translational activity, the reporter (4 ug) with 160  $\mu$ M control  
653 or *Fbl* siRNA was transfected into 100  $\mu$ L of resuspended cells from E11 dorsal cortices as  
654 described above. After 2 days, these cells were washed with PBS and treated with 0.05%  
655 Trypsin/HBSS for 10 min. Then, these cells were washed with 0.375% BSA/HBSS and  
656 harvested for sorting.

657 For cell cycle analysis, *Hes5-d2-EGFP* plasmid (2  $\mu$ g) with 160  $\mu$ M control or *Fbl*  
658 siRNA was transfected into resuspended cells from E11 dorsal cortices as mentioned above.  
659 After 2 days, cells were harvested for sorting as described above. GFP positive NSCs were  
660 sorting into 1 mL of 0.375% BSA/PBS with SH800 (SONY). Then, ice-cold 100% ethanol (3  
661 ml) were added into these sorted cells with gently vortex. These cells were fixed at -30 °C for 1  
662 h, followed by centrifugation at 1500 g for 5 min. After remove of supernatant, 700  $\mu$ L of  
663 staining solution (50  $\mu$ g/ml propidium iodide (nacalai tesque) and 100  $\mu$ g/ml RNase A in 1%  
664 BSA/PBS) was added and mixed well by pipetting. Sorting of cells was performed by SH800  
665 according with the manufacturer's protocol.

666

667 **O-propargyl-puromycin (OPP) visualization**

668 Cells from E14 dorsal cortices with different genotypes were isolated and cultured for one day as  
669 described above. Two  $\mu$ L of OPP reagent was added into medium and incubated for 30 min.  
670 These cells were fixed with 1% PFA overnight and OPP signal was detected using Click-iT™  
671 Plus OPP Alexa Fluor™ 488 Protein Synthesis Assay Kit (Invitrogen) as the manufacturer's

672 protocol. To distinguish NSCs, immunostaining was performed with Sox2 antibody. OPP signal  
673 was measured in Sox2 positive cells using CellProfiler (2.1.1) <sup>67</sup>.

674

### 675 **Protein stability measurement**

676 Cells from E11 dorsal cortices were treated with 100 µg/ml cycloheximide for 0.5, 1 and 2 h  
677 followed by collection for western blot. As control, cells without treatment were also collected.

678

### 679 **Knockout of 5'UTR of *Ezh2* and *Kdm6b***

680 Two µg of pCAG-EGFP plasmid with 1 µg of gRNA plasmid for 5'UTR of *Ezh2* and *Kdm6b*  
681 and 1 µg of pCAX-Cas9 was transfected into cells from E11 cortices with NEON and these cells  
682 were cultured as mentioned above. Two days after transfection, GFP positive cells were sorting  
683 with the SH800 (SONY). These cells were used for reverse transcription (RT)-quantitative (Q)  
684 PCR, western blot and genotyping. For cells used for genotyping, 5µL protein kinase K was  
685 added and incubated for 1 h. After the treatment at 98°C for 5 min, genotyping was performed  
686 used following primer: *Ezh2* forward:5'-

687 GAATTCTGCAGTCGACGCTTGATAGTGCTGGGGG-3' *Ezh2* reverse: 5'-

688 CCGCGGTACCGTCGACGCCGAAGACTGGCCAGGC-3' *Kdm6b* forward:5'-

689 GAATTCTGCAGTCGAGGCCTGGGTGCTGGATTTG -3' *Kdm6b* reverse: 5'-

690 CCGCGGTACCGTCGATCAGCATCAAGAGCCCCTAG-3'. PCR products of these primers

691 was cloned into pCAG plasmid cut with SalI and sequencing. For the cells used for RT-QPCR,

692 total RNA was extracted by RNeasy Mini Kits (Qiagen) and genomic DNA was removed by the

693 treatment of DNase (Qiagen). RNA (30 ng) was used for synthesis of cDNA with PrimerScript

694 RT reagent kit with gDNA eraser (TAKARA BIO). QPCR was performed with TB Green

695 Premix Ex-taq II (TAKARA BIO). *Gapdh* was used as internal reference to normalize the

696 dosage of *Ezh2* and *Kdm6b* mRNA level, following primers were used for QPCR: *Ezh2* forward:

697 5'-GAGCGTATAAAGACACCACCTAAAC-3'; *Ezh2* reverse: 5'-

698 CTCTGTCACTGTCTGTATCCTTTG-3'. *Kdm6b* forward: 5'-

699 CCCCCATTTAGCTGACTAA-3'; *Kdm6b* reverse: 5'-CTGGACCAAGGGGTGTGTT-3';

700 *Gapdh* forward: 5'-ATGAATACGGCTACAGCAACAGG-3'; *Gapdh* reverse: 5'-

701 CTCTTGCTCAGTGCCTTGCTG-3'.

702 The cells used for western blot were treated as described above.

703 **Knock out of *Fbl* and *Trp53* by CRISPER/Cas9 system**

704 The gRNA plasmid together with pCAX-Cas9 were transfected into cells from E10 dorsal  
705 cortices with NEON as described above. To label knockout cells, EGFP was simultaneously  
706 knocked into *beta-actin* locus as described before<sup>49</sup>. For  $2 \times 10^5$  cells, 0.5 ug of each plasmid was  
707 used. For clone analysis, 10,000 electroporated cells were mixed with 190,000 untreated cells  
708 and cultured for 4 days. Culture medium was changed every 2 days.

709 To knockout of *Fbl* and *Trp53 in utero*, 0.3 ug/ $\mu$ L gRNA sets and pCAX-Cas9 were  
710 electroporated into dorsal brains at E11. *In utero* electroporation in mice was reported  
711 previously<sup>68,69</sup>.

712

713 **Calculation of rRNA level**

714 Dorsal cortices were removed from E14 mice with different genotypes. RNA extraction was  
715 performed as described above. To examine rRNA level, we used the method described before  
716 with modification<sup>70</sup>. Briefly, 10 ng RNA was mixed with 1  $\mu$ M random primer and 1 mM dNTP  
717 (high condition) or 0.004 mM dNTP (low high) and incubated 65°C for 5 min. Then, 5 $\times$  First  
718 Stand buffer (invitrogen), 10 $\times$  SuperScript® III Reverse Transcriptase (invitrogen), 0.005 mM  
719 DTT and 20 $\times$  RNase inhibitor (TAKARA BIO) was added and the mix was incubated at 50 °C  
720 for 1 h followed by 70 °C for 15 min. QPCR was then performed as described above to  
721 determine the dosage of amplicon of each primer at different conditions. Following primer sets  
722 were used: 28S\_1673 forward: 5'-CTAGTGGGCCACTTTTGGTA-3'; 28S\_1673 reverse: 5'-  
723 TTCATCCCGCAGCGCCAGTT-3' ; 28S\_2614 forward: 5'-  
724 TAGGTAAGGGAAGTCGGCAA-3'; 28S\_2614 reverse: 5'-  
725 CCTTATCCCGAAGTTACGGA-3'; 28S\_3441 forward: 5'-  
726 ATGACTCTCTTAAGGTAGCC-3'; 28S\_3441 reverse: 5'-  
727 TCACTAATTAGATGACGAGG-3'; 28S\_4223 forward: 5'-  
728 GGTTAGTTTTACCCTACTGA-3'; 28S\_4223 reverse: 5'-GATTACCATGGCAACAACAC-3';  
729 28S\_4242 forward: 5'-TGATGTGTTGTTGCCATGGT-3'; 28S\_4242 reverse: 5'-  
730 GTTCCTCTCGTACTGAGCAG-3'; 28S\_3958 forward: 5'-CTCGCTTGATCTTGATTTTC-3';  
731 28S\_3958 reverse: 5'-CGCTTTCACGGTCTGTATTC-3'; 28S\_4188 forward: 5'-  
732 TAGGGAACGTGAGCTGGGTTTAGA-3'; 28S\_4188 reverse: 5'-

733 GTAAAACTAACCTGTCTCACGACG-3' ; Methylation level of rRNA was calculated as  
734 dosage of amplicon at low condition/ dosage of amplicon at high condition.

735

### 736 **Motif find and calculation of minimum free energy**

737 To find the motif of mRNAs that downregulate or upregulate their translational efficiency after  
738 knockout of *Fbl*, 5' UTR sequence of selected genes were initially extracted from Table Browser  
739 (UCSC) <http://genome.ucsc.edu/cgi-bin/hgTables>. Next, HOMER was used to extract enriched  
740 motif by findMotifsGenome.pl function with size=200. For each 5' UTR, minimum free energy  
741 was calculated every 50bp by ViennaRNA Package 2.4.14<sup>71</sup> with RNALfold L50 -g and the  
742 minimum value was used.

743

### 744 **Statistics**

745 Multiple comparisons for cell counting and 5'UTR knockout experiments were done using one-  
746 way ANOVA followed by a Tukey's HSD. Student t-test was used to test cap-independent  
747 translational activity after knockdown of *Fbl*. To test whether methylation level on rRNA are  
748 reduced in DKO comparing with control cells, one-sided wilcoxon signed rank test was used.  
749 Kruskal-Wallis test with Dunn's multiple-comparison test was used to test different PC  
750 contribution of genes and global protein level among different genotypes of mice. Wilcoxon  
751 signed rank test was used to test MEF of different gene groups. R, RStudio, and Excel  
752 (Microsoft) were used for these analyses.

753

### 754 **Acknowledgments**

755 We thank A. Shitamukai, I. Fujita, Y. Tsunekawa, D. Konno and all members in Matsuzaki  
756 laboratory for their discussion and technologic advices. We thank C. Tanegashima, K. Tatsumi,  
757 and O. Nishimura of the Laboratory for Phyloinformatics, RIKEN Center for Biosystems  
758 Dynamics Research (BDR) for NGS library preparation, sequencing, and assistance on data  
759 production and analysis. This work was supported by the Japan Society for the Promotion of  
760 Science (JSPS) Grants-in-Aid for Scientific Research (KAKENHI) grand no. 18K14722 to  
761 Q.W., Scientific Research on Innovative Areas 17H05779 and 19H04791, and RIKEN funds to

762 F.M. Q.W. was also supported by JSPS Postdoctoral Fellowship and RIKEN Special  
763 Postdoctoral Researcher Program.

764

#### 765 **Author contributions**

766 F.M. supervised the project. F.M. and Q.W. designed experiments and wrote the manuscript.  
767 Q.W. carried out experiments and performed the bioinformatics analysis of data. Y.S. and S.I  
768 developed the methods for ribosome profiling using dorsal cortices and helped Q.W. in the  
769 analysis of ribosome profiling data. T.A and H.K. generated *Fbl* conditional knockout mice. T.S.  
770 did *in utero* electroporation. A.O helped Q.W. for sequencing, QPCR, and purification of  
771 plasmids.

772

#### 773 **Data and materials availability**

774 All raw and proceeded data for scRNA, ChIP-seq and Ribo-seq are available at the DNA Data  
775 Bank of Japan with accession number DRA009567, DRA009568, DRA009569 and  
776 DRA009729, and E-GEAD-348, E-GEAD-349, E-GEAD-350 and E-GEAD-351.

777 Code used in this study including WGCNA, Cytoscape (3.7.2), Seurat (2.3.4), monocle (2.10.1),  
778 Trim Galore! (0.4.2), hisat2 (2.1.0), Ribodiff (0.2.1), bowtie (1.2.1.1), Picard, Samtools (1.5),  
779 MACS2 (2.1.1), ngsplot (2.61), IGV (2.4.3), Deeptools (3.2.1), ChromHMM (1.14), DiffBind  
780 (2.10.0), CellProfiler (2.1.1), ViennaRNA (2.4.14), stringtie (1.3.6) and TCC 1.22.1 are available  
781 from indicated manual or references.

782

#### 783 **Declaration of interests**

784 The authors declare no completing interests.

785

786 **References**

- 787 1. Cinquin, O. Understanding the somitogenesis clock: what's missing? *Mech. Dev.* **124**,  
788 501–517 (2007).
- 789 2. Newport, J. & Kirschner, M. A major developmental transition in early *Xenopus* embryos:  
790 I. characterization and timing of cellular changes at the midblastula stage. *Cell* **30**, 675–  
791 686 (1982).
- 792 3. Sibon, O. C., Stevenson, V. A. & Theurkauf, W. E. DNA-replication checkpoint control at  
793 the *Drosophila* midblastula transition. *Nature* **388**, 93–97 (1997).
- 794 4. Beatrice, D., Fero, M. L., Roberts, J. M. & C, R. M. p27/kip1 alters the response of cells  
795 to mitogen and is part of a cell- intrinsic timer that arrests the cell cycle and initiates  
796 differentiation. *Current Biology* **8**, 431–440 (1998).
- 797 5. Horvath, S. & Raj, K. DNA methylation-based biomarkers and the epigenetic clock theory  
798 of ageing. *Nat. Rev. Genet.* **19**, 371–384 (2018).
- 799 6. Florio, M. & Huttner, W. B. Neural progenitors, neurogenesis and the evolution of the  
800 neocortex. *Development* **141**, 2182–2194 (2014).
- 801 7. Noctor, S. C., Martinez-Cerdeño, V. & Kriegstein, A. R. Neural stem and progenitor cells  
802 in cortical development. *Novartis Found. Symp.* **288**, 59–73– discussion 73–8– 96–8  
803 (2007).
- 804 8. Kohwi, M. & Doe, C. Q. Temporal fate specification and neural progenitor competence  
805 during development. *Nat Rev Neurosci* **14**, 823–838 (2013).
- 806 9. Okano, H. & Temple, S. Cell types to order: temporal specification of CNS stem cells.  
807 *Current Opinion in Neurobiology* **19**, 112–119 (2009).
- 808 10. Okamoto, M. *et al.* Cell-cycle-independent transitions in temporal identity of mammalian  
809 neural progenitor cells. *Nature Communications* **7**, 11349 (2016).
- 810 11. Kohwi, M., Lupton, J. R., Lai, S.-L., Miller, M. R. & Doe, C. Q. Developmentally  
811 Regulated Subnuclear Genome Reorganization Restricts NeuralProgenitor Competence in  
812 *Drosophila*. *Cell* **152**, 97–108 (2013).
- 813 12. Telley, L. *et al.* Temporal patterning of apical progenitors and their daughter neurons in  
814 the developing neocortex. *Science* **364**, eaav2522 (2019).
- 815 13. Pereira, J. D. *et al.* Ezh2, the histone methyltransferase of PRC2, regulates the balance  
816 between self-renewal and differentiation in the cerebral cortex. *PNAS* **107**, 15957–15962  
817 (2010).
- 818 14. Morimoto-Suzki, N. *et al.* The polycomb component Ring1B regulates the timed  
819 termination of subcerebral projection neuron production during mouse neocortical  
820 development. *Development* **141**, 4343–4353 (2014).
- 821 15. Hirabayashi, Y. *et al.* Polycomb Limits the Neurogenic Competence of Neural Precursor  
822 Cells to Promote Astrogenic Fate Transition. *Neuron* **63**, 600–613 (2009).
- 823 16. Weinreb, C., Wolock, S. & Klein, M. A. SPRING: a kinetic interface for visualizing  
824 highdimensional single-cell expression data. *Bioinformatics* **34**, 1246–1248 (2018).
- 825 17. Ohtsuka, T. *et al.* Visualization of embryonic neural stem cells using Hes promoters in  
826 transgenic mice. *Molecular and Cellular Neuroscience* **31**, 109–122 (2006).
- 827 18. Langfelder, P. & Horvath, S. WGCNA: an R package for weighted correlation network  
828 analysis. *BMC Bioinformatics* **9**, 559 (2008).

- 829 19. Incarnato, D. *et al.* High-throughput single-base resolution mapping of RNA 2'-O-  
830 methylated residues. *Nucleic Acids Research* **45**, 1433–1441 (2016).
- 831 20. Marcel, V. *et al.* p53 Acts as a Safeguard of Translational Control by Regulating  
832 Fibrillarin and rRNAMethylation in Cancer. *Cancer Cell* **24**, 318–330 (2013).
- 833 21. Newton, K., Petfalski, E., Tollervey, D. & Caceres, J. F. Fibrillarin Is Essential for Early  
834 Development and Required for Accumulation of an Intron-Encoded Small Nucleolar RNA  
835 in the Mouse. *Molecular and Cellular Biology* **23**, 8519–8527 (2003).
- 836 22. Bouffard, S. *et al.* Fibrillarin is essential for S-phase progression and neuronal  
837 differentiation in zebrafish dorsal midbrain and retina. *Dev. Biol.* **437**, 1–16 (2018).
- 838 23. Erales, J. *et al.* Evidence for rRNA 2'-O-methylation plasticity: Control of intrinsic  
839 translational capabilities of human ribosomes. *Proc Natl Acad Sci USA* **114**, 12934–12939  
840 (2017).
- 841 24. Watanabe-Susaki, K. *et al.* Biosynthesis of Ribosomal RNA in Nucleoli Regulates  
842 Pluripotency and Differentiation Ability of Pluripotent Stem Cells. *Stem Cells* **32**, 3099–  
843 3111 (2014).
- 844 25. Sugitani, Y. *et al.* Brn-1 and Brn-2 share crucial roles in the production and positioning of  
845 mouse neocortical neurons. *Genes Dev.* **16**, 1760–1765 (2002).
- 846 26. Nagao, M., Ogata, T., Sawada, Y. & Gotoh, Y. Zbtb20 promotes astrocytogenesis during  
847 neocortical development. *Nature Communications* **7**, 11102 (2019).
- 848 27. Toma, K., Kumamoto, T. & Hanashima, C. The Timing of Upper-Layer Neurogenesis Is  
849 Conferred by Sequential Derepression and Negative Feedback from Deep-Layer Neurons.  
850 *Journal of Neuroscience* **34**, 13259–13276 (2014).
- 851 28. Ingolia, N. T., Sina, G., S, N. J. R. & Weissman, J. S. Genome-Wide Analysis in Vivo  
852 of Translation with Nucleotide Resolution Using Ribosome Profiling. *Science* **324**, 218–  
853 223 (2009).
- 854 29. Yoon, K.-J., Vissers, C., Ming, G.-L. & Song, H. Epigenetics and epitranscriptomics in  
855 temporal patterning of cortical neural progenitor competence. *J. Cell Biol.* **217**, 1901–  
856 1914 (2018).
- 857 30. Weingarten-Gabbay, S. *et al.* Systematic discovery of cap-independent translation  
858 sequences in human and viral genomes. *Science* **351**, aad4939 (2016).
- 859 31. Miskimins, W. K., Wang, G., Hawkinson, M. & Miskimins, R. Control of Cyclin-  
860 Dependent Kinase Inhibitor p27 Expression by Cap-Independent Translation. *Molecular  
861 and Cellular Biology* **21**, 4960–4967 (2001).
- 862 32. Gao, F. B., Durand, B. & Raff, M. Oligodendrocyte precursor cells count time but not cell  
863 divisions before differentiation. *Current Biology* **7**, 152–155 (1997).
- 864 33. Grosskortenhaus, R., Pearson, B. J., Marusich, A. & Doe, C. Q. Regulation of Temporal  
865 Identity Transitions in Drosophila Neuroblasts. *Dev. Cell* **8**, 193–202 (2005).
- 866 34. Bernstein, B. E. *et al.* A Bivalent Chromatin Structure Marks Key Developmental Genes  
867 in Embryonic Stem Cells. *Cell* **125**, 315–326 (2006).
- 868 35. Oberst, P. *et al.* Temporal plasticity of apical progenitors in the developing mouse  
869 neocortex. *Nature* **573**, 370–374 (2019).
- 870 36. Donaldson-Collier, M. C. *et al.* EZH2 oncogenic mutations drive epigenetic,  
871 transcriptional, and structural changes within chromatin domains. *Nature Genetics* **51**,  
872 517–528 (2019).
- 873 37. Rao, S. S. P. *et al.* A 3D Map of the Human Genome at Kilobase Resolution Reveals  
874 Principles of Chromatin Looping. *Cell* **159**, 1665–1680 (2014).



- 875 38. Dai, Q. *et al.* Nm-seq maps 2'-O-methylation sites in human mRNA with base precision.  
876 *Nature Methods* **14**, 695–698 (2017).
- 877 39. Elliott, B. A. *et al.* Modification of messenger RNA by 2'-O- methylation regulates gene  
878 expression in vivo. *Nature Communications* **10**, 3401 (2019).
- 879 40. Choi, J. *et al.* -O-methylation in mRNA disrupts tRNA decoding during translation  
880 elongation. *Nat Struct Mol Biol* **25**, 208–216 (2018).
- 881 41. Shi, Z. *et al.* Heterogeneous Ribosomes Preferentially Translate Distinct Subpools of  
882 mRNAs Genome-wide. *Molecular Cell* **67**, 71–83.e7 (2017).
- 883 42. Yuzwa, S. A. *et al.* Developmental Emergence of Adult Neural Stem Cells as Revealed by  
884 Single-Cell Transcriptional Profiling. *CellReports* **21**, 3970–3986 (2017).
- 885 43. Tsukada, T. *et al.* Enhanced proliferative potential in culture of cells from p53-deficient  
886 mice. *Oncogene* **8**, 3313–3322 (1993).
- 887 44. Ohtsuka, T. *et al.* Gene Expression Profiling of Neural Stem Cells and Identification of  
888 Regulators of Neural Differentiation During Cortical Development. *Stem Cells* **29**, 1817–  
889 1828 (2011).
- 890 45. Shannon, P. *et al.* Cytoscape: a software environment for integrated models of  
891 biomolecular interaction networks. *Genome Res.* **13**, 2498–2504 (2003).
- 892 46. Kuleshov, M. V. *et al.* Enrichr: a comprehensive gene set enrichment analysis web server  
893 2016 update. *Nucleic Acids Research* **44**, W90–7 (2016).
- 894 47. Konno, D. *et al.* The Mammalian DM Domain Transcription Factor Dmrta2 Is Required  
895 for Early Embryonic Development of the Cerebral Cortex. *PLoS ONE* **7**, e46577 (2012).
- 896 48. Shitamukai, A., Konno, D. & Matsuzaki, F. Oblique Radial Glial Divisions in the  
897 Developing Mouse Neocortex Induce Self-Renewing Progenitors outside the Germinal  
898 Zone That Resemble Primate Outer Subventricular Zone Progenitors. *Journal of*  
899 *Neuroscience* **31**, 3683–3695 (2011).
- 900 49. Tsunekawa, Y. *et al.* Developing a de novotargeted knock-in method based on in  
901 uteroelectroporation into the mammalian brain. *Development* **143**, 3216–3222 (2016).
- 902 50. DiCarlo, J. E. *et al.* Genome engineering in *Saccharomyces cerevisiae* using CRISPR-Cas  
903 systems. *Nucleic Acids Research* **41**, 4336–4343 (2013).
- 904 51. Butler, A., Hoffman, P., Smibert, P., Papalexi, E. & Satija, R. Integrating single-cell  
905 transcriptomic data across different conditions, technologies, and species. *Nature*  
906 *Biotechnology* **36**, 411–420 (2018).
- 907 52. Trapnell, C. *et al.* the dynamics and regulators of cell fate decisions are revealed by  
908 pseudotemporal ordering of single cells. *Nature Biotechnology* **32**, 381–386 (2014).
- 909 53. McGlincy, N. J. & Ingolia, N. T. Transcriptome-wide measurement of translation by  
910 ribosome profiling. *Methods* **126**, 112–129 (2017).
- 911 54. Kim, D., Paggi, J. M., Park, C., Bennett, C. & Salzberg, S. L. Graph-based genome  
912 alignment and genotyping with HISAT2 and HISAT-genotype. *Nature Biotechnology* **37**,  
913 907–915 (2019).
- 914 55. Zhong, Y. *et al.* RiboDiff: detecting changes of mRNA translation efficiency from  
915 ribosome footprints. *Bioinformatics* **31**, 139–141 (2016).
- 916 56. Perteau, M., Kim, D., Perteau, G. M., Leek, J. T. & Salzberg, S. L. Transcript-level  
917 expression analysis of RNA-seq experiments with HISAT, StringTie and Ballgown.  
918 *Nature Protocols* **11**, 1650–1667 (2016).
- 919 57. Jianqiang, S., Tomoaki, N., Shimizu, K. & Kadota, K. TCC: an R package for comparing  
920 tag count data with robust normalization strategies. *BMC Bioinformatics* **14**, 219 (2013).

- 921 58. Langmead, B., Trapnell, C., Pop, M. & Salzberg, S. L. Ultrafast and memory-efficient  
922 alignment of short DNA sequences to the human genome. *Genome Biology* **10**, R25  
923 (2009).
- 924 59. Li, H. *et al.* The Sequence Alignment/Map format and SAMtools. *Bioinformatics* **25**,  
925 2078–2079 (2009).
- 926 60. Zhang, Y. *et al.* Model-based analysis of ChIP-Seq (MACS). *Genome Biology* **9**, R137  
927 (2008).
- 928 61. Ramírez, F. *et al.* deepTools2: a next generation web server for deep-sequencing data  
929 analysis. *Nucleic Acids Research* **44**, W160–W165 (2016).
- 930 62. Ernst, J. & Kellis, M. ChromHMM: automating chromatin-state discovery and  
931 characterization. *Nature Methods* **9**, 215–216 (2012).
- 932 63. Stark, R. & Brown, G. DiffBind: Differential binding analysis of ChIP- Seq peak data.  
933 **Bioconductor**<http://bioconductor.org/packages/release/bioc/html/DiffBind.html>,  
934 (2019).
- 935 64. Krzywinski, M. *et al.* Circos: an information aesthetic for comparative genomics. *Genome*  
936 *Res.* **19**, 1639–1645 (2009).
- 937 65. Hara, Y. *et al.* Optimizing and benchmarking de novo transcriptome sequencing: from  
938 library preparation to assembly evaluation. *BMC Genomics* **16**, 977 (2015).
- 939 66. Kadota, M. *et al.* CTCF binding landscape in jawless fish with reference to Hox cluster  
940 evolution. *Scientific reports* **7**, 4957 (2017).
- 941 67. Kametsky, L. *et al.* Improved structure, function and compatibility for CellProfiler:  
942 modular high-throughput image analysis software. *Bioinformatics* **27**, 1179–1180 (2011).
- 943 68. Fujita, I. *et al.* Endfoot regeneration restricts radial glial state and prevents translocation  
944 into the outer subventricular zone in early mammalian brain development. *Nat Cell Biol*  
945 **22**, 26–37 (2020).
- 946 69. Konno, D. *et al.* Neuroepithelial progenitors undergo LGN-dependent planar divisions to  
947 maintain self-renewability during mammalian neurogenesis. *Nat Cell Biol* **10**, 93–101  
948 (2007).
- 949 70. Incarnato, D. *et al.* High-throughput single-base resolution mapping of RNA 2'-O-  
950 methylated residues. *Nucleic Acids Research* **45**, 1433–1441 (2016).
- 951 71. Ronny, L. *et al.* ViennaRNA Package 2.0. *Algorithms for Molecular Biology* 6:26 (2011).  
952



## Figure 1 | Genome-wide H3K4me3 and H3K27me3 modification change during temporal patterning of NSCs.

**a**, Experiment design for single cell (sc) RNA-seq and ChIP-seq. Cell number in scRNA were E11 n=829, E12 n= 2457, E13 n=1566 and E14 n=1293.

**b,c**, SPRING graph of single cells coloured by different stages (b), and expression patterns of an early- and a late-onset gene, *Hmga2* and *Zbtb20*, respectively (c).

**d**, H3K27me3 and H3K4me3 change of isolated Hes1+ NSCs from E11 to E14. Lines represent 200-bp chromosome regions.

**e,f**, Intensity comparison of H3K27me3 (e) and H3K4me3 (f) peaks between E11 and E14 NSCs, showing that H3K27me3 changed more dramatically than H3K4me3.

**g-j**, Read-density profiling of H3K27m3 (g, h) and H3K4m3 (i, j) at early-onset (g, i) and late-onset genes (h, j) in wild type E11 and E14 NSCs.

**k**, Circos plot showing H3K27me3 pattern change from E11 to E14. Several late-onset genes were highlighted and de-repression of these genes can be observed at E14.

**l,m**, Principal component analysis (PCA) of H3K27me3 and H3K4me3 peaks, showing H3K27me3 samples can represent developmental time. Arrow indicates temporal axes.

**Figure2**

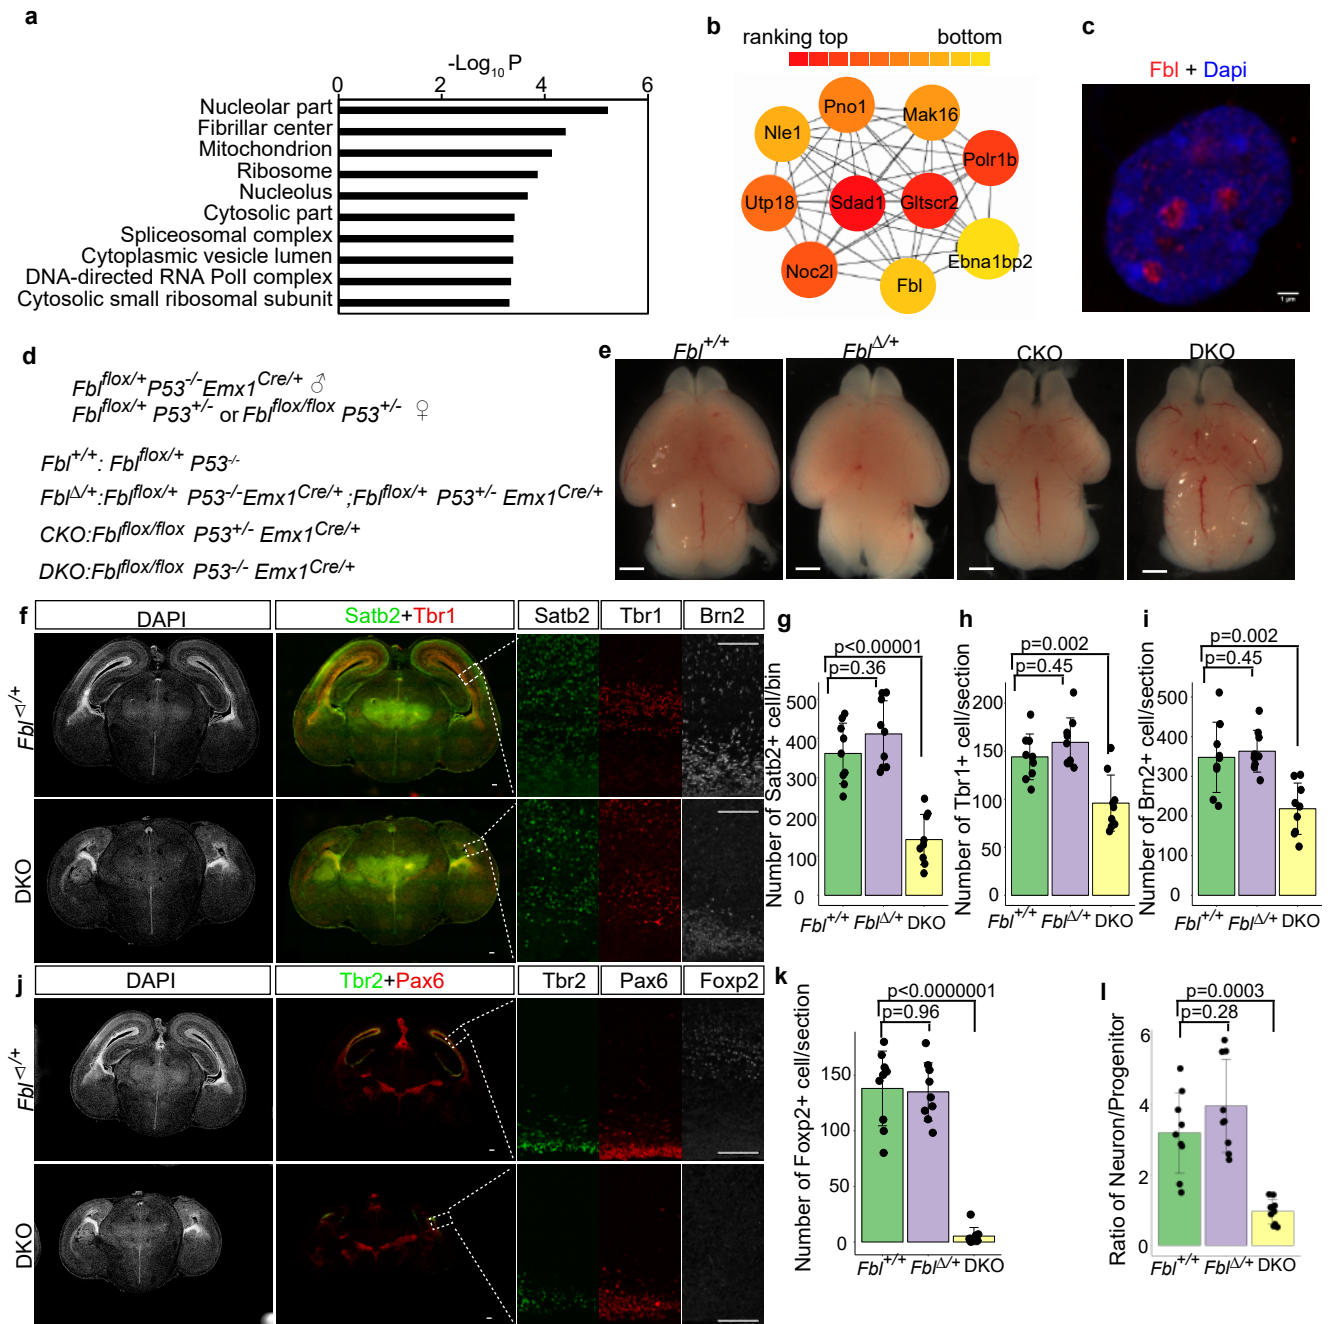

**Figure 2 | Fbl is essential for brain development.**

**a**, Gene Ontology (GO) analysis of the gene module (brown module) that showed higher expression in E11 than E14 NSCs.

**b**, Top 10 module nodes based on protein interaction networks in the brown module.

**c**, E14 NSC stained for Fbl and Dapi showing nucleolar Fbl expression (n=5). Scale bars, 1  $\mu$ m.

**d**, Mutant mice generation.

**e**, Whole-mount brain image at E17 showing microcephaly after Fbl knockout. Scale bars, 1mm.

**f,j**, E17 brain sections showing reduced number of both deep- and upper-neurons in DKO. Scale bars, 100  $\mu$ m.

**g-i,k**, Immunostaining-based cell number quantification (n=3 mice per genotype, n=3 sections per mouse).

**l**, Ratio of Tbr1+ or Brn2+ neurons and Pax6+ or Tbr2+ progenitors (n=3 mice per genotype, n=3 sections per mouse). Data are presented as the mean $\pm$ s.d. of n=9 sections (one-way ANOVA followed by Tukey's post-hoc tests).

**Figure3**

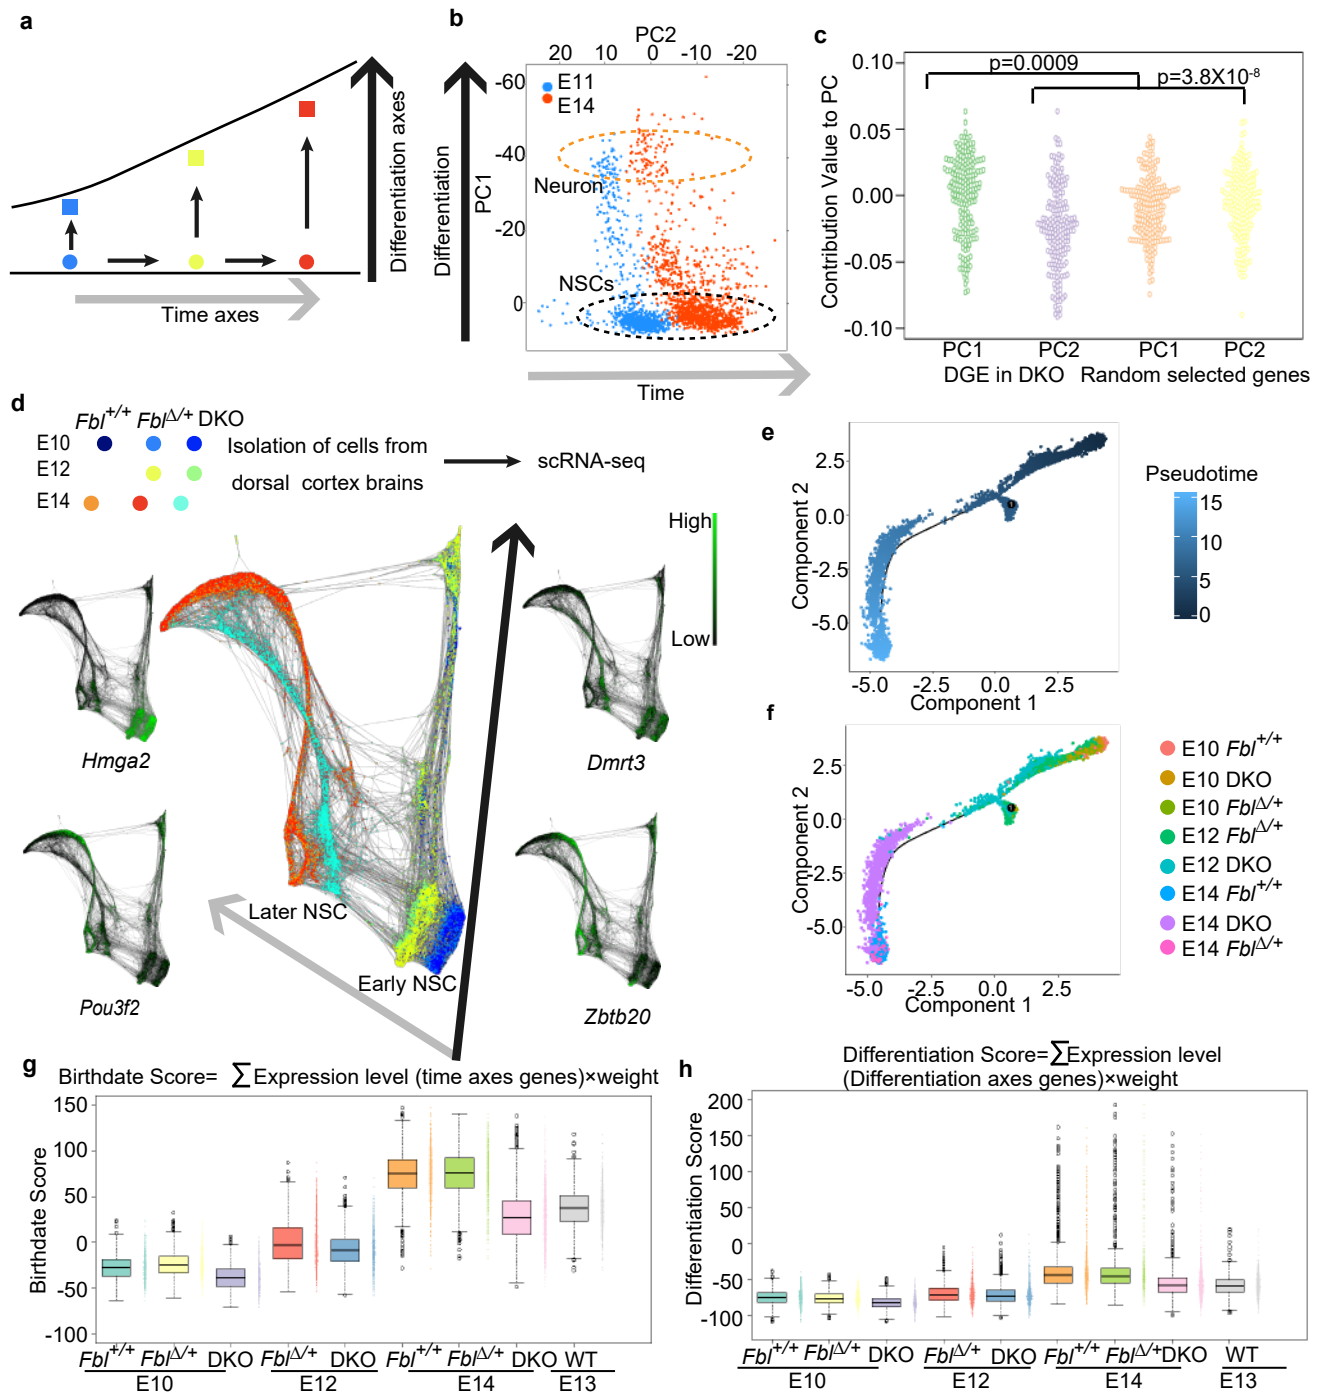

**Figure 3 | Single cell transcriptome analysis of temporal patterning in NSCs.**

**a**, Model of NSC temporal identity progression.

**b**, Principal components analysis (PCA) of transcriptome from E11 (n=846) and E14 cells (n=1293) organizes the cells on two axes: differentiation axis (PC1) and time axis (PC2). Orange circle: neurons; black circle: NSCs.

**c**, PC contribution of differentially expressed genes (DEG) between E14 DKO and  $Fbl^{\Delta/+}$  NSCs showing that *Fbl* affects both the differentiation axis and the time axis (Kruskal-Wallis test and Dunn's test with Bonferroni correction).

**d**, SPRING graph of single cells coloured by genotype from different stages, and expression patterns of several early- and late-onset genes. E10  $Fbl^{+/+}$  n=836, E10  $Fbl^{\Delta/+}$  n=1202, E10 DKO n=651, E12  $Fbl^{\Delta/+}$  n=2070, E12 DKO 2260, E14  $Fbl^{+/+}$  n=3905, E14 DKO n=2879, E14  $Fbl^{\Delta/+}$  n=2592.

**e,f**, Pseudo-time alignment of NSCs via Monocle.

**g,h**, Scoring single-cell identity with a mathematical model. Only NCSs that identified according tSNE analysis were used in e-h (see Extend Data Fig. 4b). E10  $Fbl^{+/+}$  n=691, E10  $Fbl^{\Delta/+}$  n=982, E10 DKO n=581, E12  $Fbl^{\Delta/+}$  n=1228, E12 DKO n=1183, E14  $Fbl^{+/+}$  n=1046, E14 DKO n=1480, E14  $Fbl^{\Delta/+}$  n=577. Data are presented as box-whiskers (left) and bee swarm plots (right).



## Figure 4

bioRxiv preprint doi: <https://doi.org/10.1101/2020.10.08.330852>; this version posted October 8, 2020. The copyright holder for this preprint (which was not certified by peer review) is the author/funder. All rights reserved. No reuse allowed without permission.

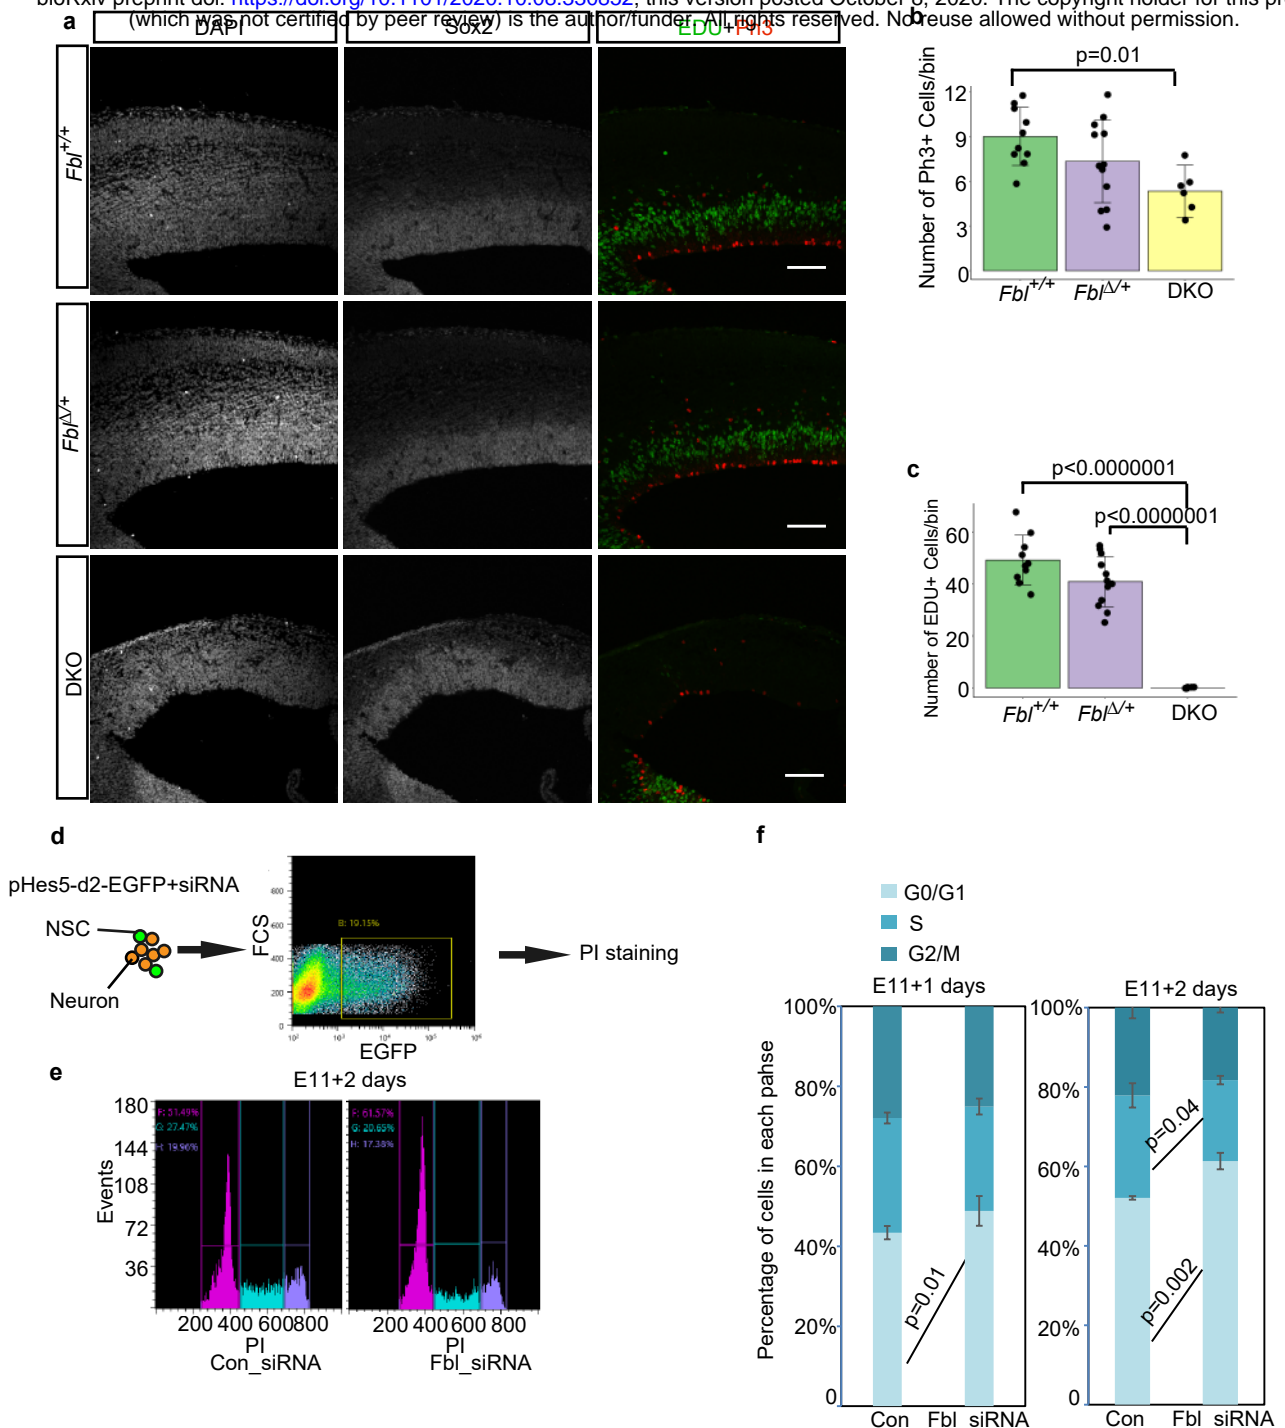

### Figure 4 | *Fbl* is essential for cell cycle progression.

**a**, Representative image of E14 brain sections stained for Sox2, Edu, and Ph3. Edu was injected 1 h before sampling. Scale bar: 100  $\mu$ m.

**b**, **c**, Cell number quantification on sections from brain based on immunostaining with the indicated markers (n=5, 6, and 3 mice for *Fbl*<sup>+/+</sup>, *Fbl*<sup>Δ/+</sup>, and DKO, respectively; n=2 sections per mouse; one-way ANOVA followed by Tukey's post-hoc tests; data are presented as mean $\pm$ s.d. of counted sections).

**d**, Schematics of the experimental design to investigate NSC cell cycle progression after treatment with control or *Fbl* siRNA. *pHes5*-d2-EGFP was used to label NSCs.

**e**, Cell cycle analysis of NSCs after *Fbl* knockdown.

**f**, Proportion of G1/G0, S, and G2/M phase change after *Fbl* knockdown for 1 day (left) or 2 days (right) (Student's t-test; data are presented as mean $\pm$ s.d.)

**Figure 5**

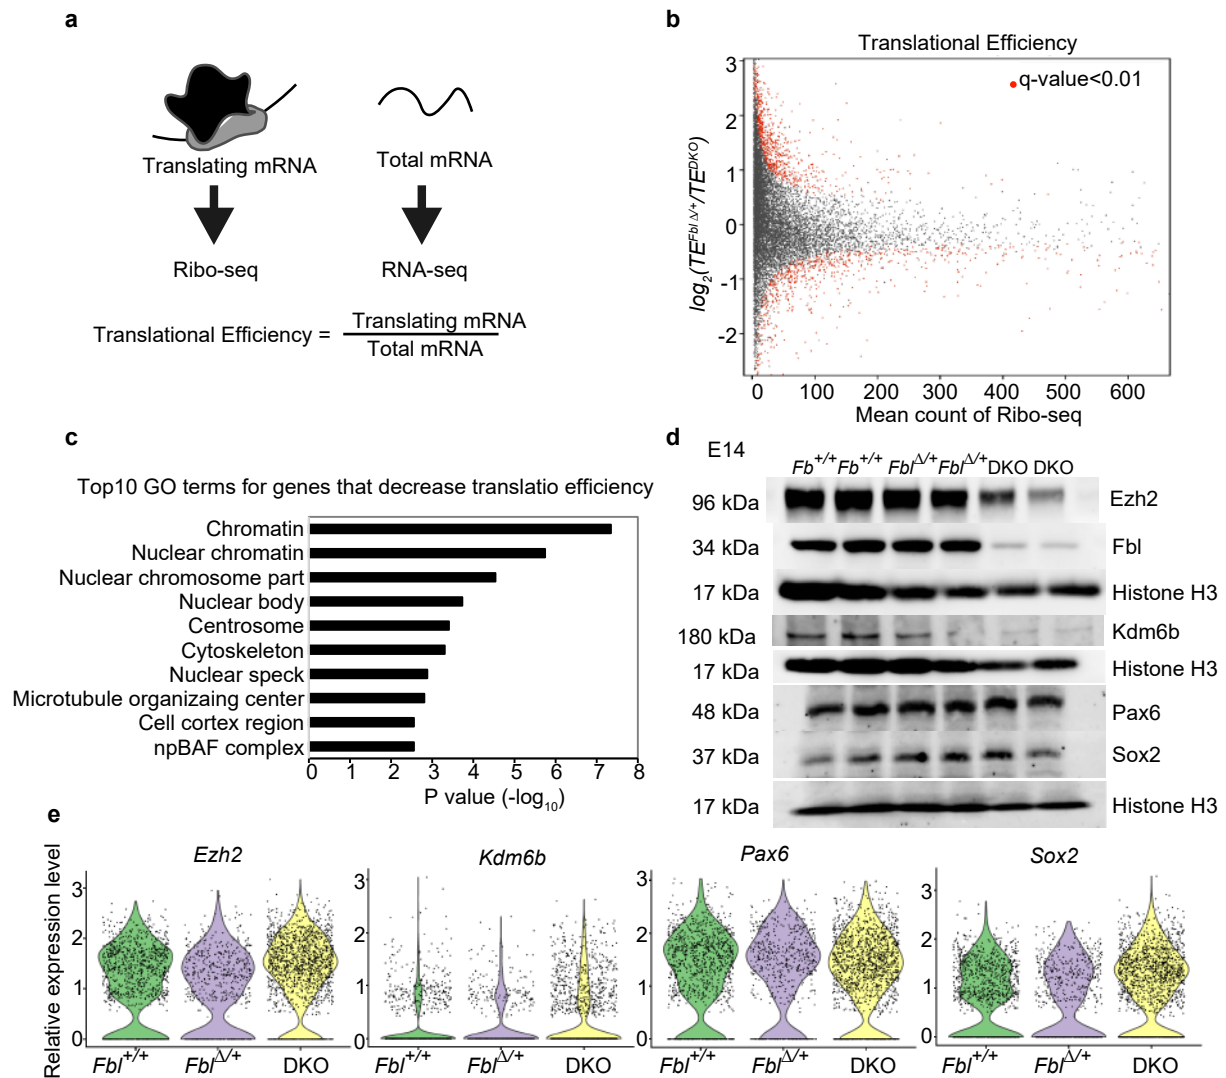

**Figure 5 | Fbl selectively regulates the translation of genes involved in H3K27me3 modification.**

**a**, Schematics of the experimental design for evaluation of translational efficiency (TE).

**b**, Mean-count and mean-difference plots comparing observed and expected variance in TE. Genes with q-value < 0.01 are shown in red.

**c**, Top 10 GO terms of transcripts showing reduced TE.

**d,e**, Western blotting (**d**) and single-cell RNA analysis (**e**) of the indicated genes, showing reduced protein levels, but not mRNA levels, of Ezh2 and Kdm6b in DKO brains at E14. Notice that Sox2 and Pax6 did not show changes in neither protein nor mRNA levels.

**Figure 6**

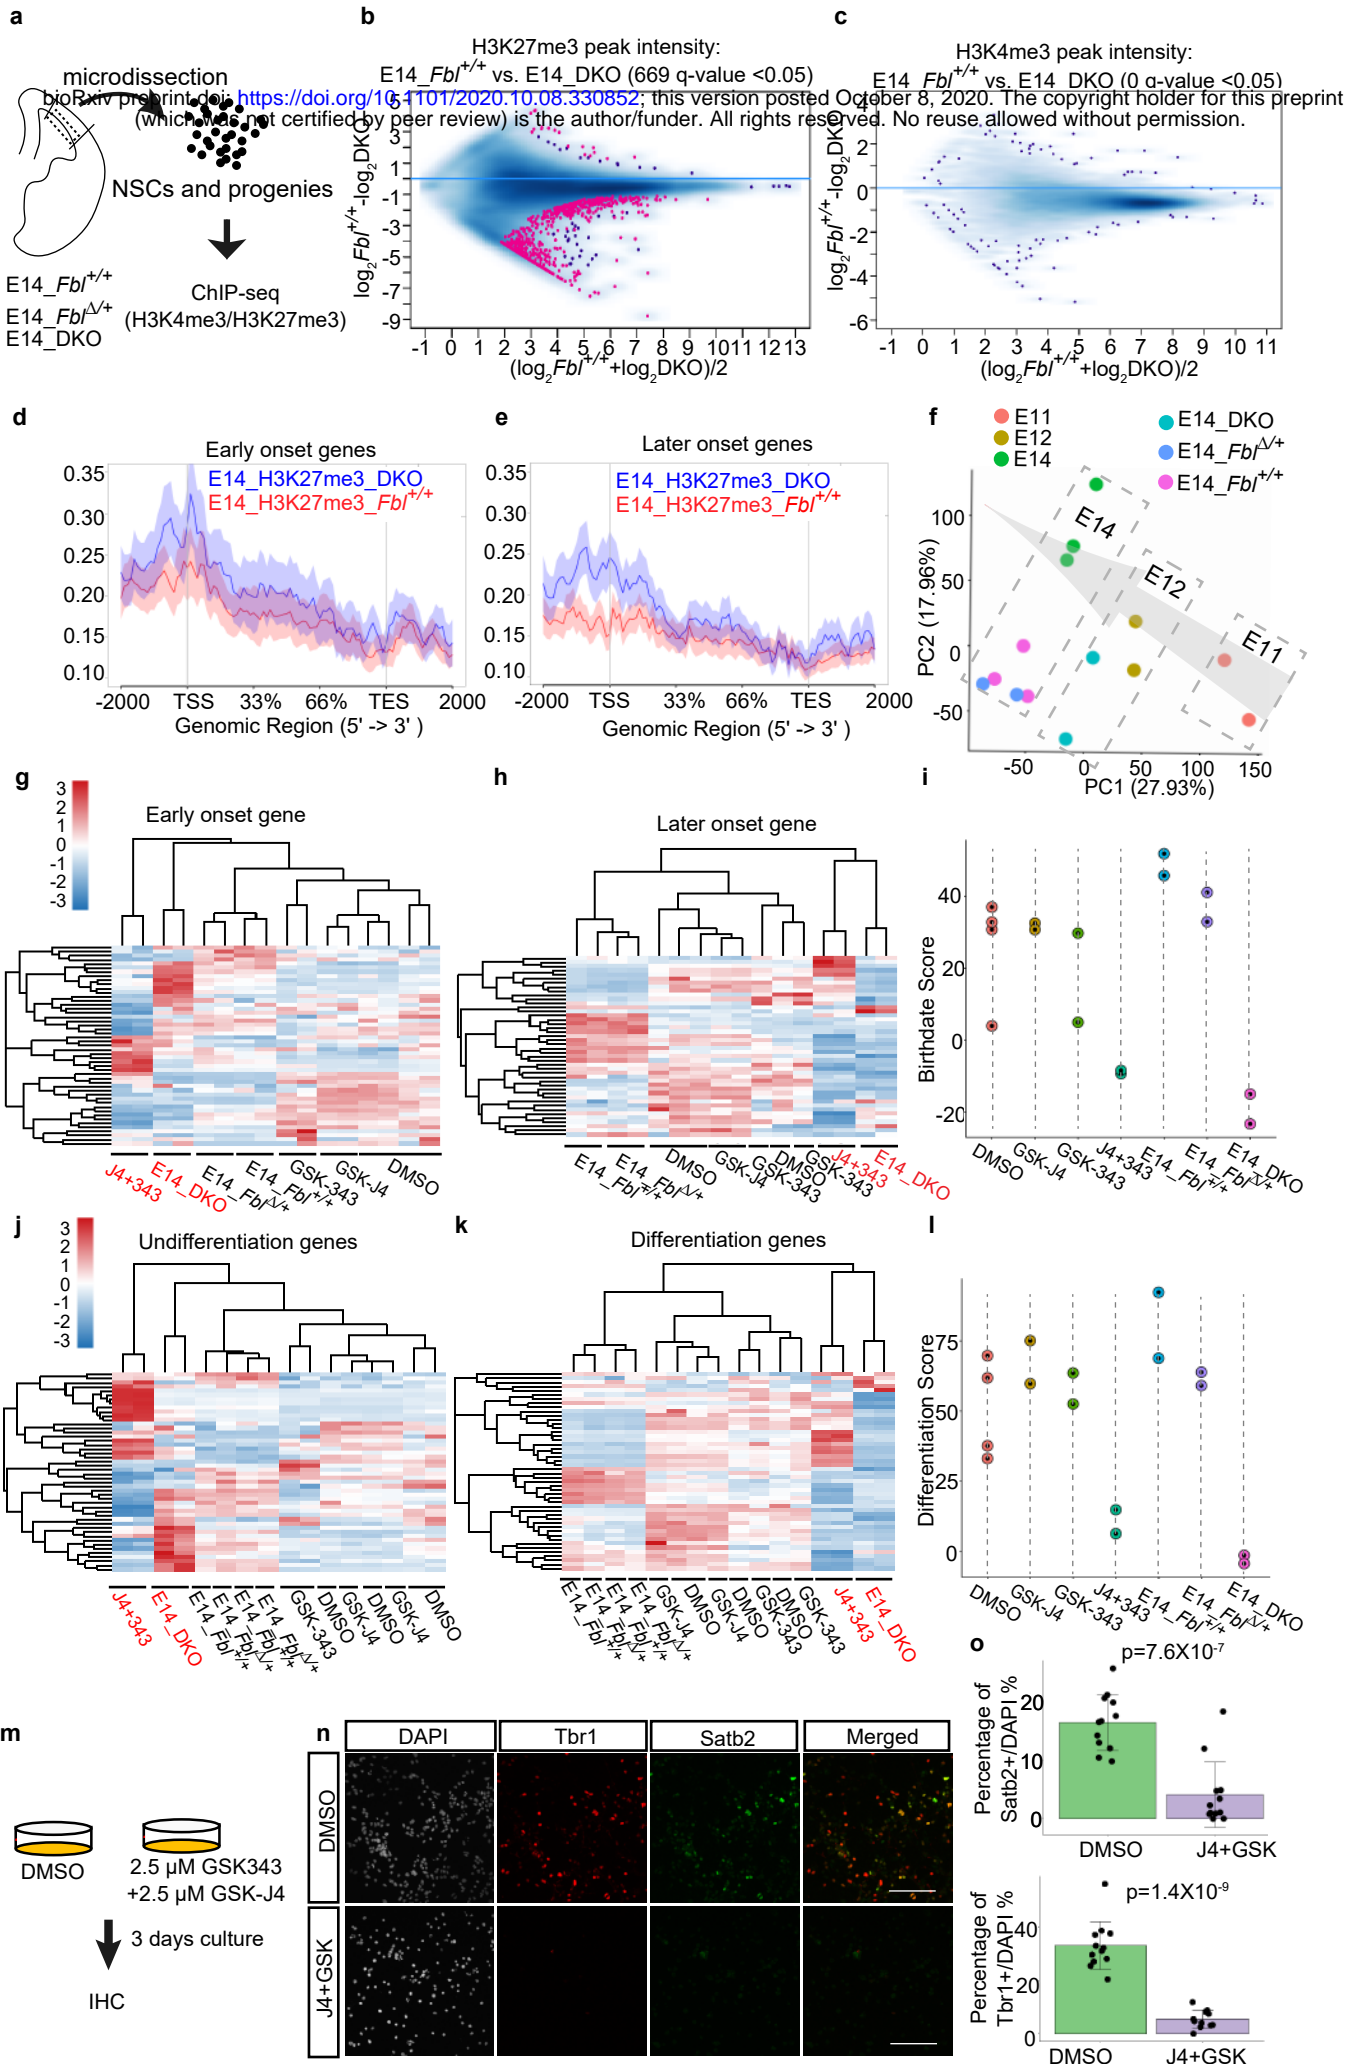

**Figure 6. Fbl regulates H3K27me3 pattern in NSCs.**

- a**, Experiment design for ChIP-seq using different genotypes.
- b,c**, Intensity comparison of H3K27me3 (**b**) and H3K4me3 (**c**) peaks between E14 control and DKO samples.
- d,e**, Read-density profiling of H3K27me3 at early-onset (**d**) and late-onset genes (**e**) in E14 control and DKO samples.
- f**, Principal component analysis (PCA) of H3K27me3 peaks, showing DKO samples were located with E12 samples. Arrow indicates temporal axes.
- g-k**, Heatmap showing gene expression change after inhibitors treatment and knockout of Fbl. Core genes involved in birthdate and differentiation were used. In all cases, simultaneous inhibition of H3K27me3 methyltransferase and demethylase showed similar gene expression pattern with Fbl DKO.
- i,l**, Birthdate (**i**) and differentiation (**l**) scoring after simultaneous inhibition of H3K27me3 methyltransferase and demethylase, showing delayed temporal progression and impeded neurogenesis. E14 samples with the indicated genotypes were used for comparison.
- m**, Schematics of the experimental design to test the effects of inhibitors on NSCs.
- n**, Representative image of cultured cells stained for Tbr1 and Satb2 after treatment with inhibitors. Scale bar: 100  $\mu$ m.
- o**, Quantification of cell number on sections based on immunostaining with the indicated markers (n=3 independent experiments). For each experiment, four regions were randomly selected and counted (Student's t-test; data are presented as mean $\pm$ s.d. of n=12 counted images).

**Figure 7**

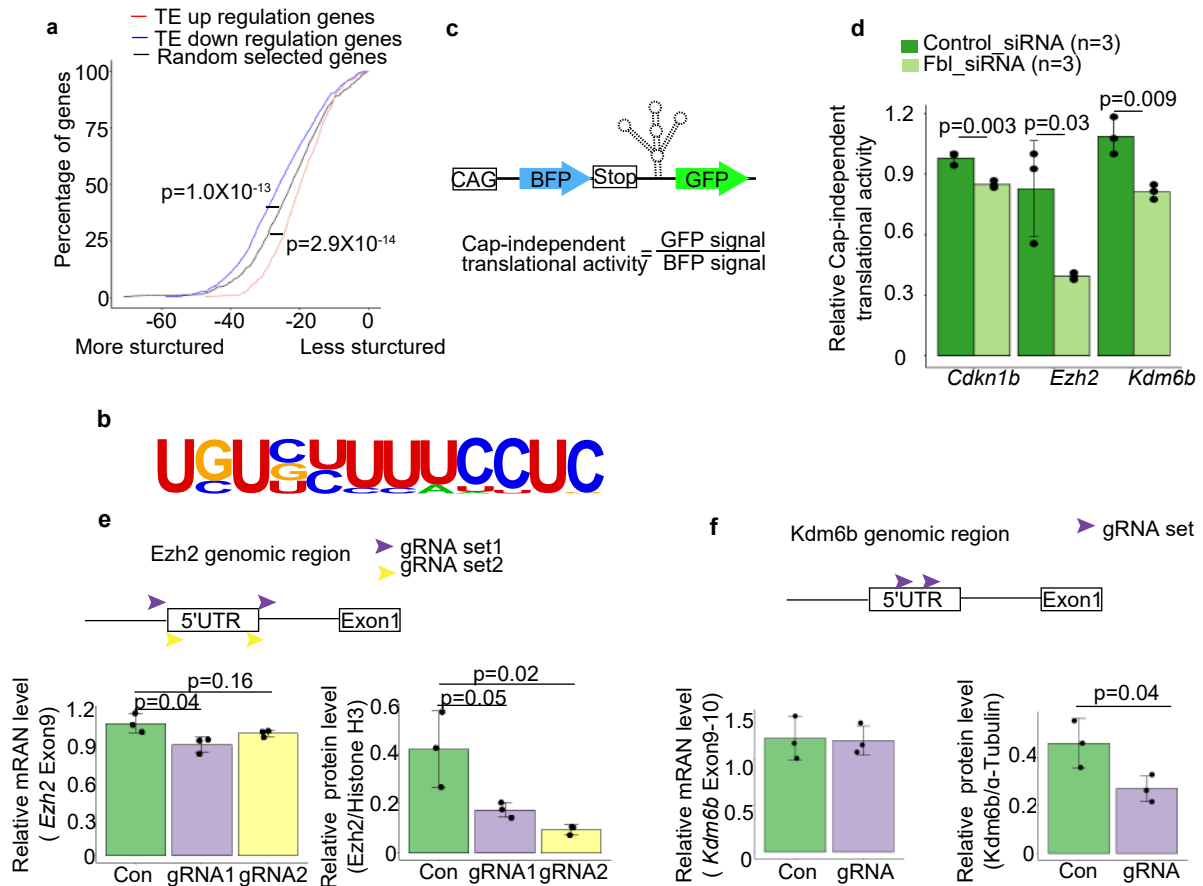

**Figure 7 | Fbl regulates translation through the 5'UTR in a cap-independent manner.**

**a**, 5'UTR minimum free energy (MFE) cumulative distribution of mRNAs showing changes in translational efficiency (TE) after Fbl knockout. Randomly selected mRNAs are shown as controls (Wilcoxon signed rank test).

**b**, A poly(U) motif enriched in the 5'UTRs of mRNAs with downregulated TE.

**c**, Experimental assessment of cap-independent translational initiation.

**d**, Relative cap-independent translational activity in control and Fbl knockdown cells (n=3, Student t-test; data are presented as mean $\pm$ s.d.)

**e,f**, Changes in mRNA (left) and protein levels (right) after Ezh2 (**e**) and Kdm6b (**f**) 5'UTR knockout (n=3; one-way ANOVA followed by Tukey's tests (**e**) and Student t-test (**f**); data are presented as mean $\pm$ s.d.)

Figure 8

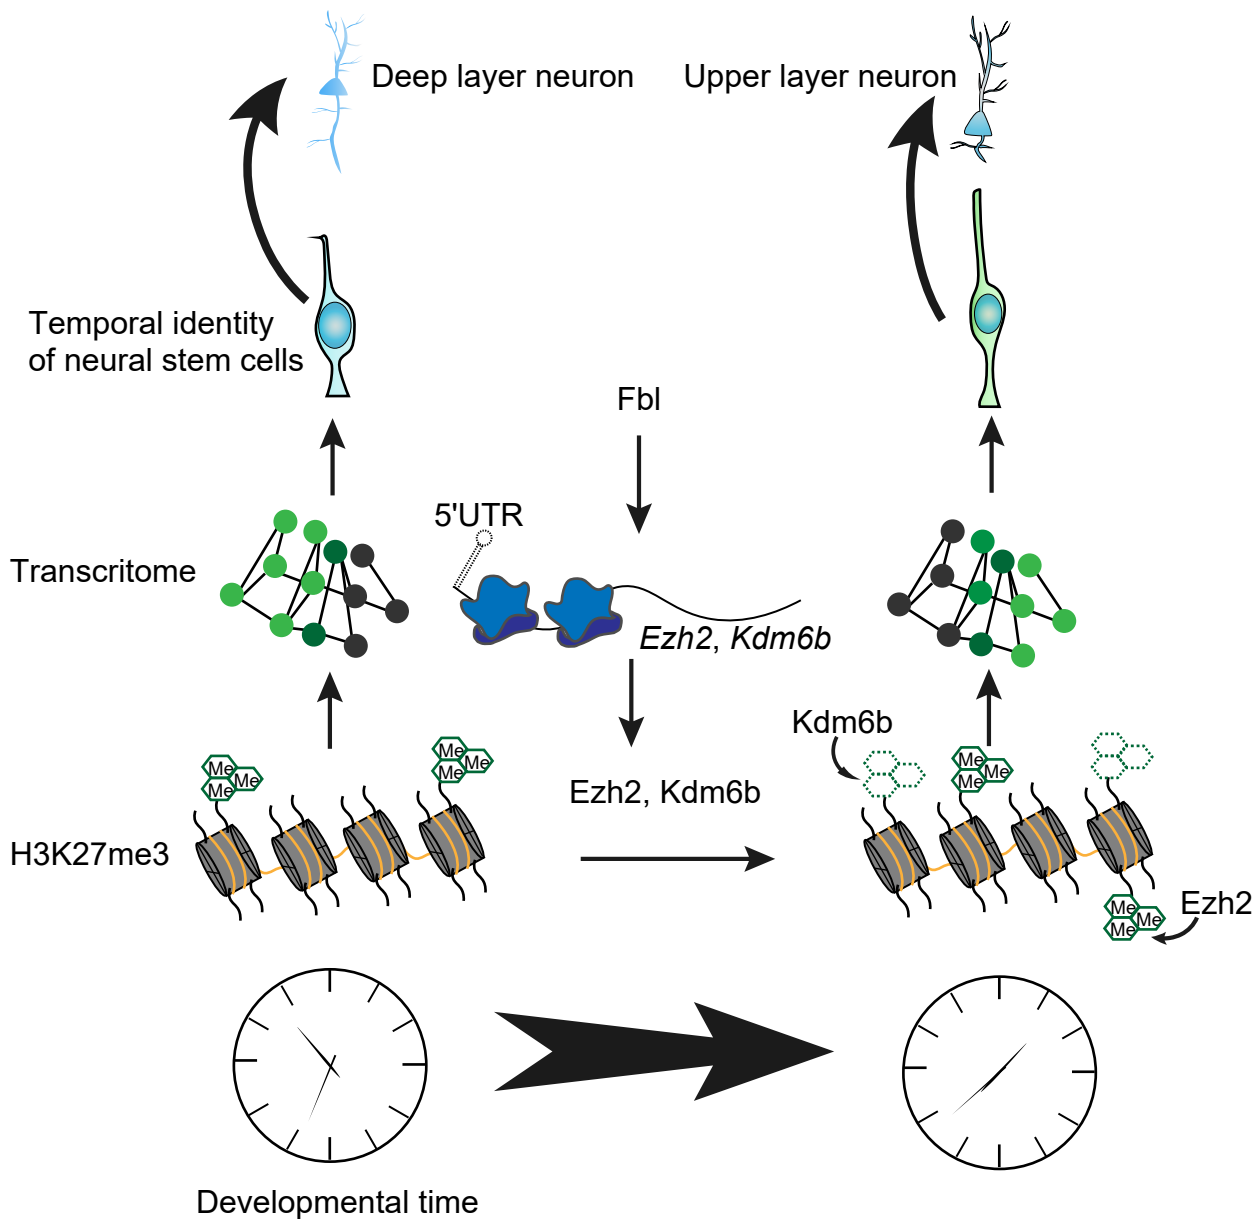

**Figure 8 | Fbl drives developmental clock of NSCs.**

Fbl selectively enhances the translation of *Ezh2* and *Kdm6b* through their the 5'UTR in a cap-independent manner. *Ezh2* and *Kdm6b* change H3K27me3 pattern in NSCs. H3K27me3 patterning further affects gene expression change and regulates the temporal fate of NSCs.

**Extended Data Fig.1**

**a** High  
Low  
bioRxiv preprint doi: <https://doi.org/10.1101/2020.10.08.330852>; this version posted October 8, 2020. The copyright holder for this preprint (which was not certified by peer review) is the author/funder. All rights reserved. No reuse allowed without permission.

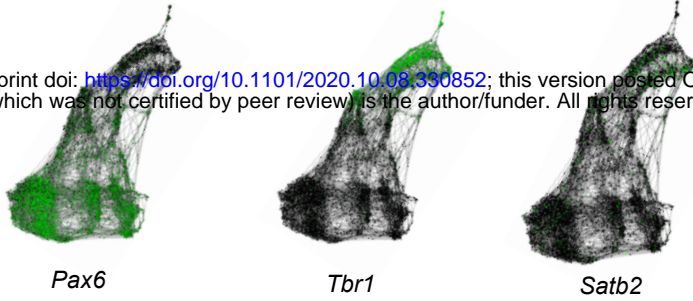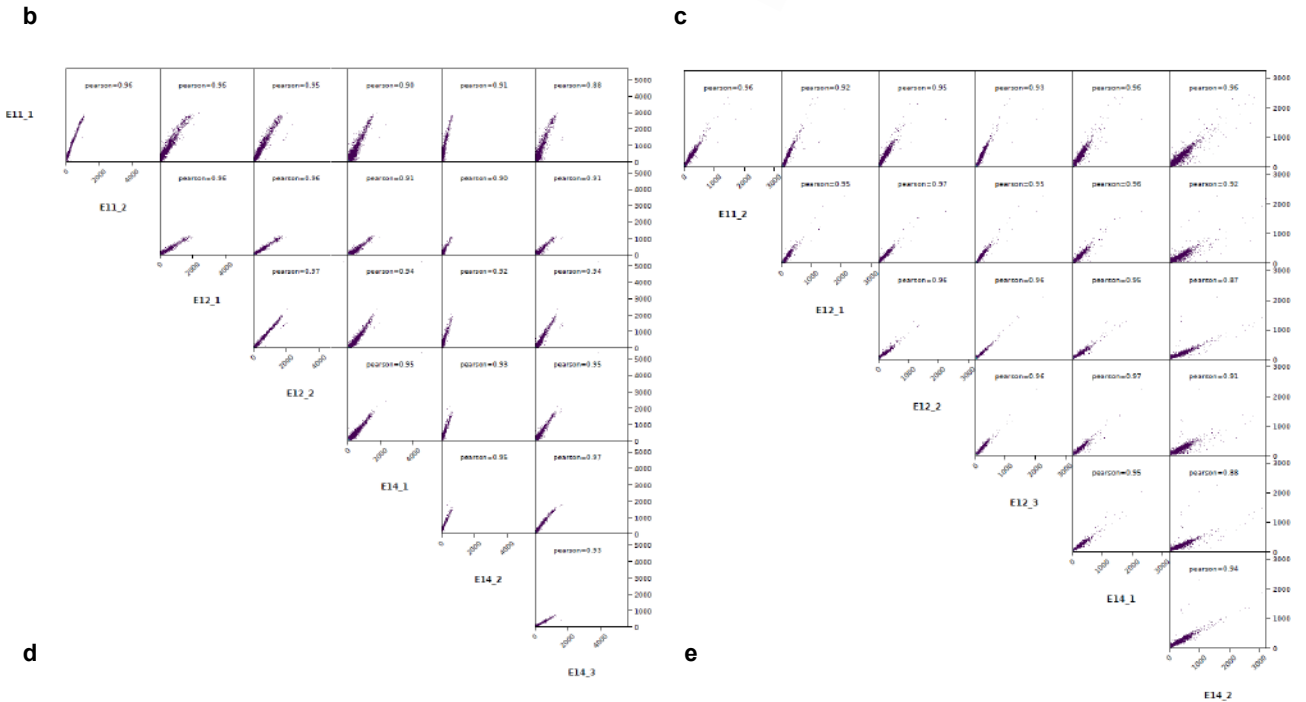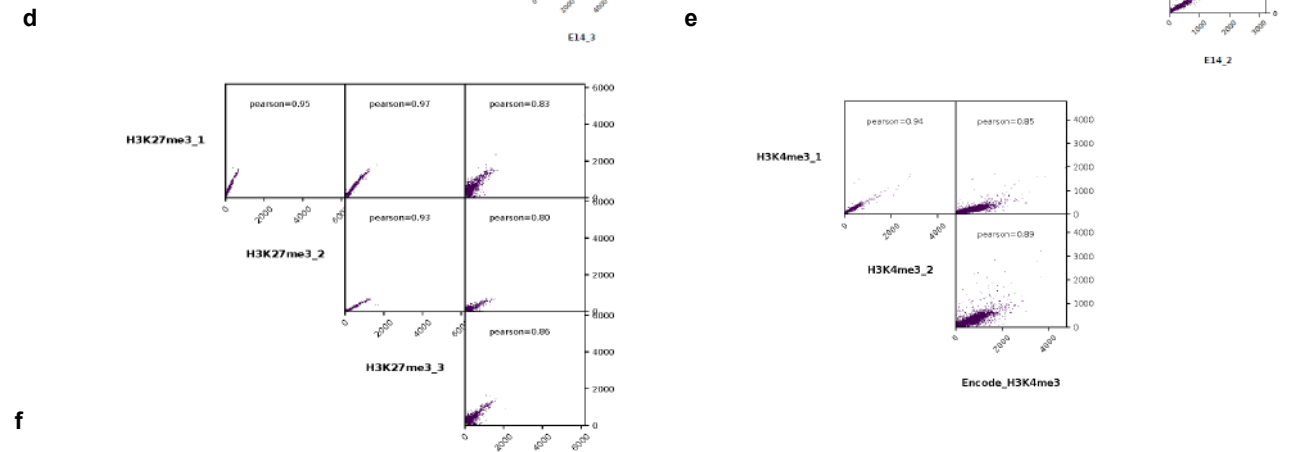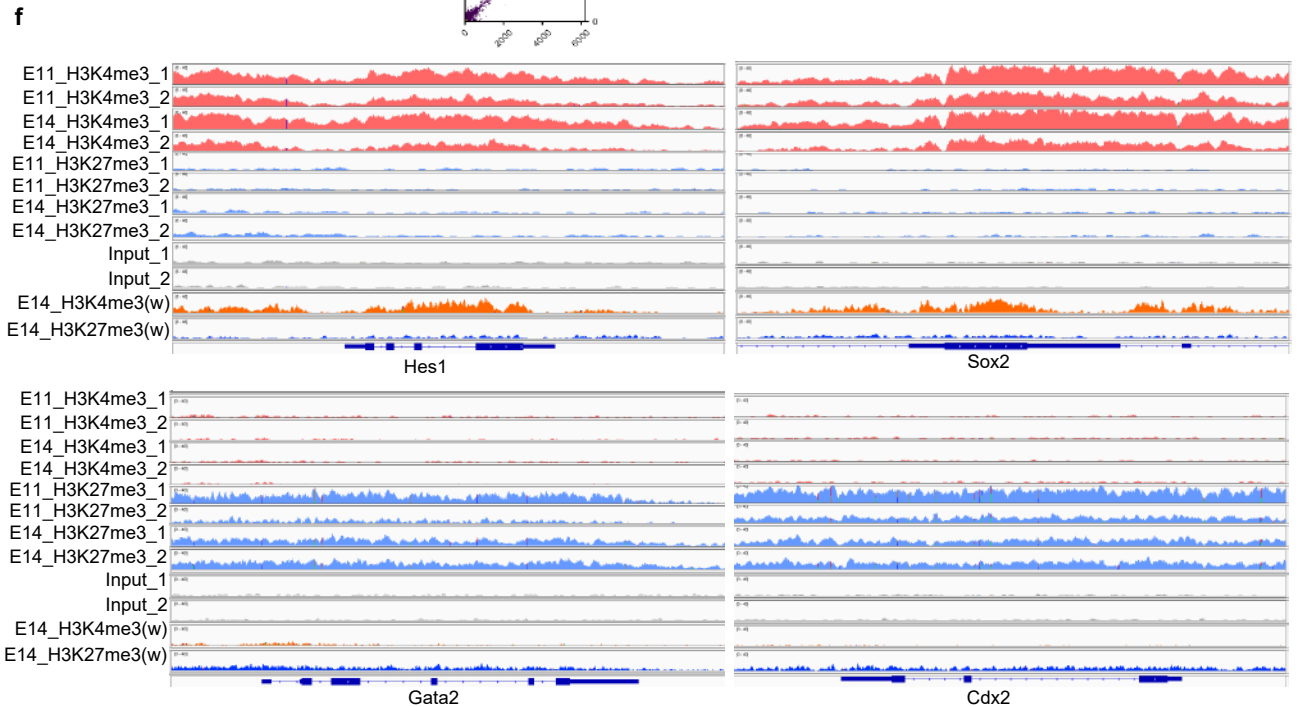

**Extended Data Fig.1 | Quality check of single cell RNA-seq and ChIP-seq experiments.**

**a**, SPRING graphs indicating the expression pattern of a NSC marker: *Pax6*, a deep layer marker: *Tbr1* and an upper layer marker: *Satb2*, respectively.

**b,c**, Sample correlation of ChIP-seq experiments using H3K27me3 (b) and H3K4me3 antibodies (c) among E11, E12, and E14 NSCs.

**d,e**, Sample correlation of ChIP-seq experiments using H3K27me3 (d) and H3K4me3 antibodies (e) between our data from E14 NSCs and published data from E14 whole brains.

**f**, Genome browser view of ChIP-seq density of the indicated genes.



**Extended Data Fig.2**

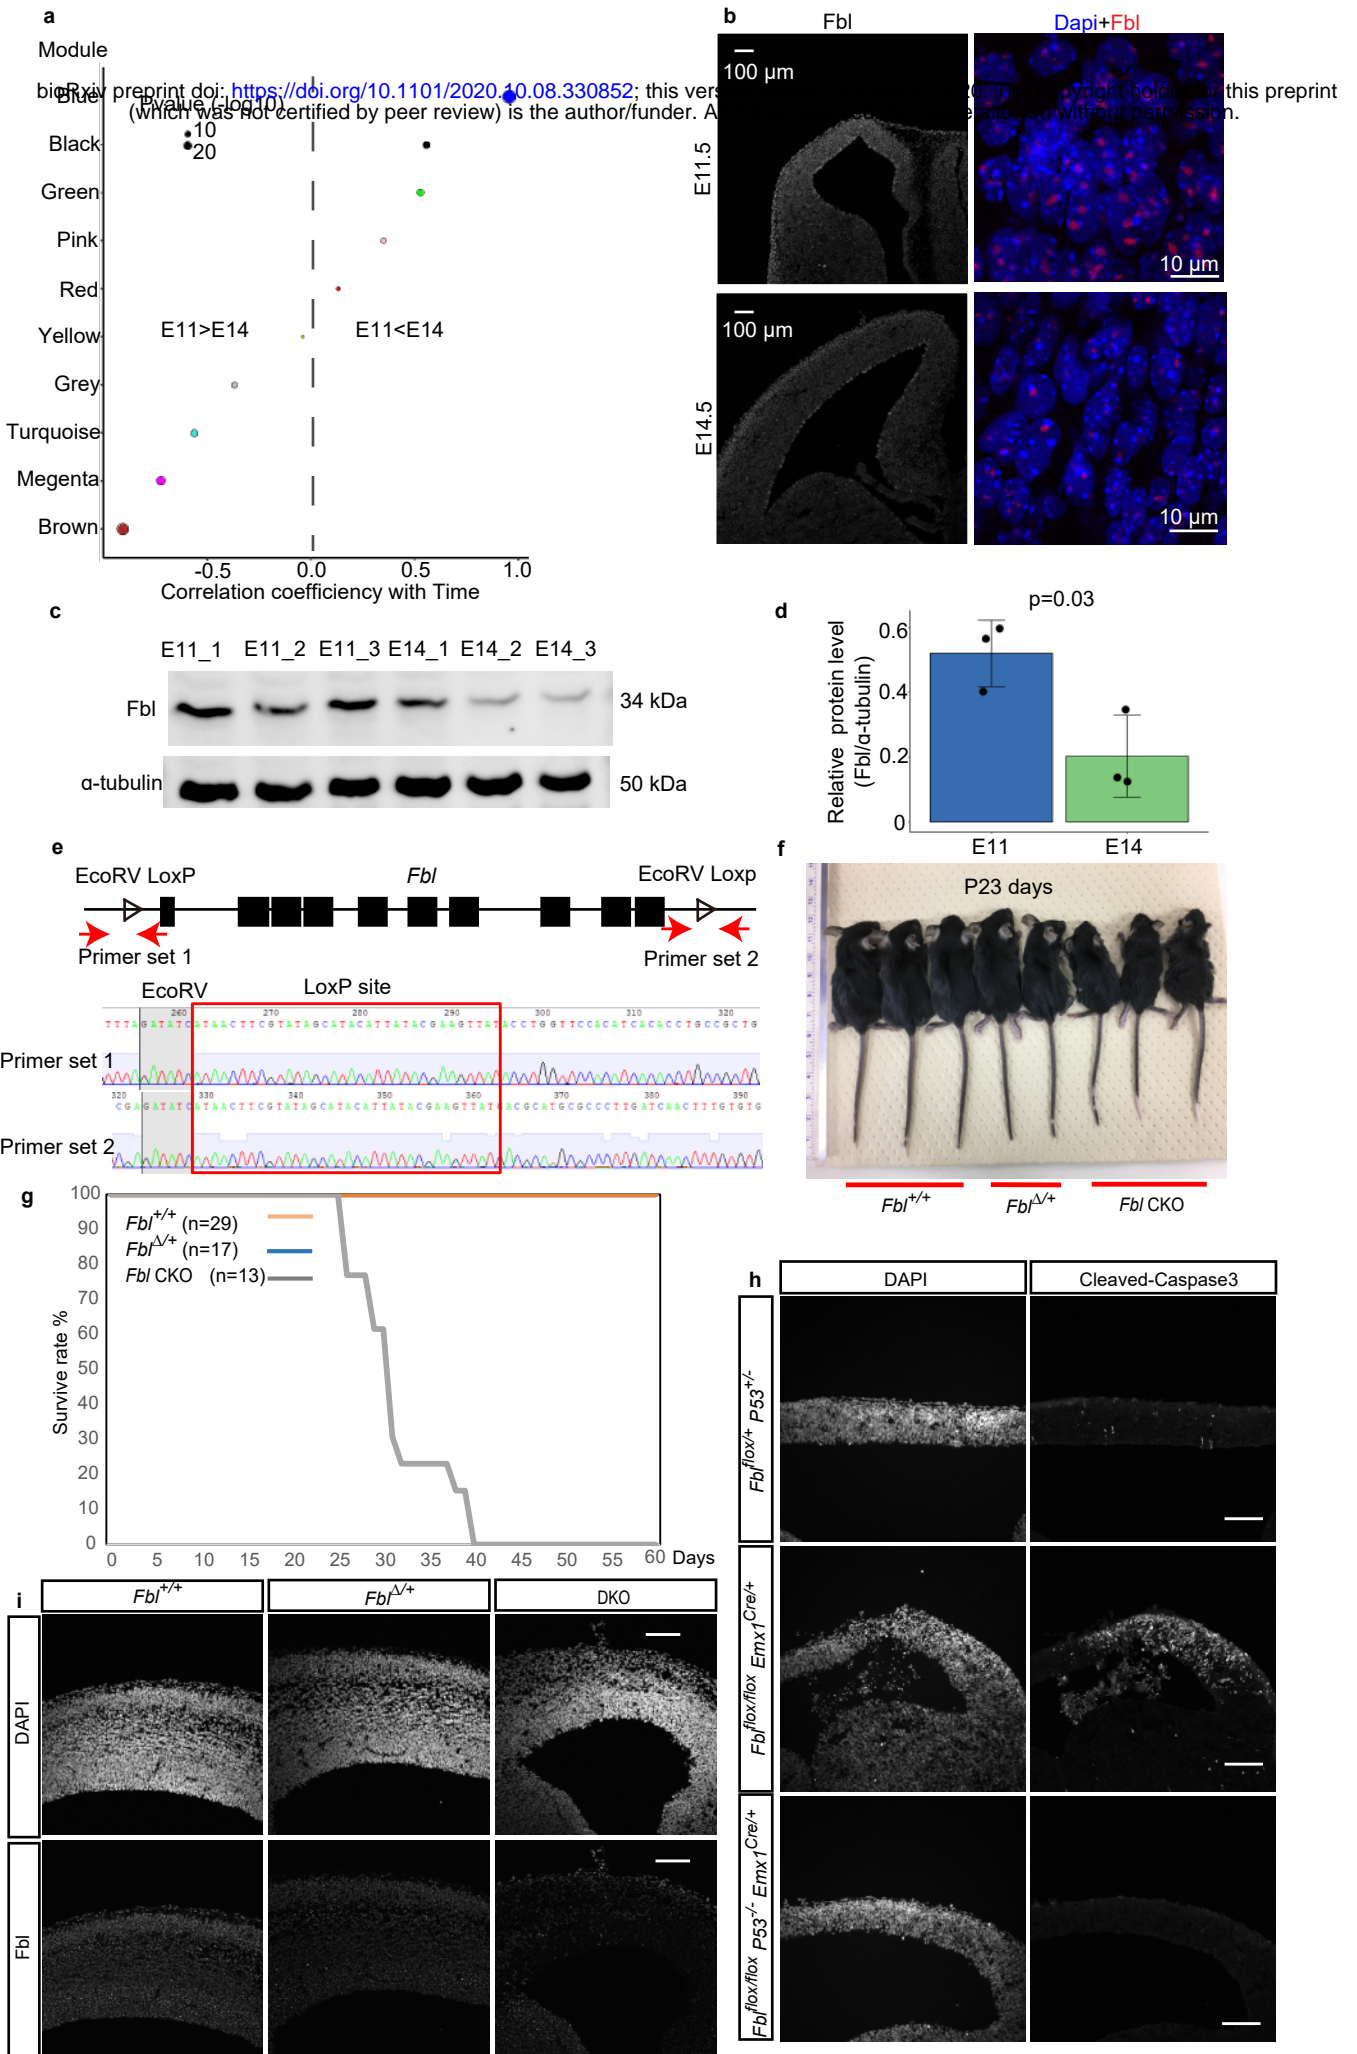

bioRxiv preprint doi: <https://doi.org/10.1101/2020.10.08.330852>; this version posted October 10, 2020. The copyright holder for this preprint (which was not certified by peer review) is the author/funder. All rights reserved. No reuse allowed without permission.

**Extended Data Fig. 2. Identification of Fbl as a candidate to promote the developmental clock in NSCs.**

- a**, WGCNA gene dendrogram classifies E11 and E14 NSCs into different modules and correlation coefficient of each module with time (E11 and E14).
- b**, Representative image of E11 and E14 brain sections stained for Fbl. Scale bar: 10 or 100  $\mu\text{m}$
- c**, Western blot of Fbl and  $\alpha$ -tubulin using isolated Hes1+ NSCs.
- d**, Quantitative analysis of Fbl protein levels showing reduced Fbl at E14 (Student t-test; data are presented as mean  $\pm$  s.d.).
- e**, Schematics of CRISPR-CAS9-dependent knock-in of loxP sites flanking Fbl. Confirmation of loxP sites by sequencing analysis.
- f**, Appearance of Fbl<sup>+/+</sup>, Fbl <sup>$\Delta$ +</sup>, and Fbl CKO pups at 23 days postnatal.
- g**, Survival rate of Fbl<sup>+/+</sup>, Fbl <sup>$\Delta$ +</sup>, and Fbl CKO pups.
- h**, Representative image of E12 brain section stained for cleaved-caspase 3 antibody. Scale bar: 100  $\mu\text{m}$ .
- i**, Representative image of E14 brain section stained for Fbl. Scale bar: 100  $\mu\text{m}$ .

Extended Data Fig.3

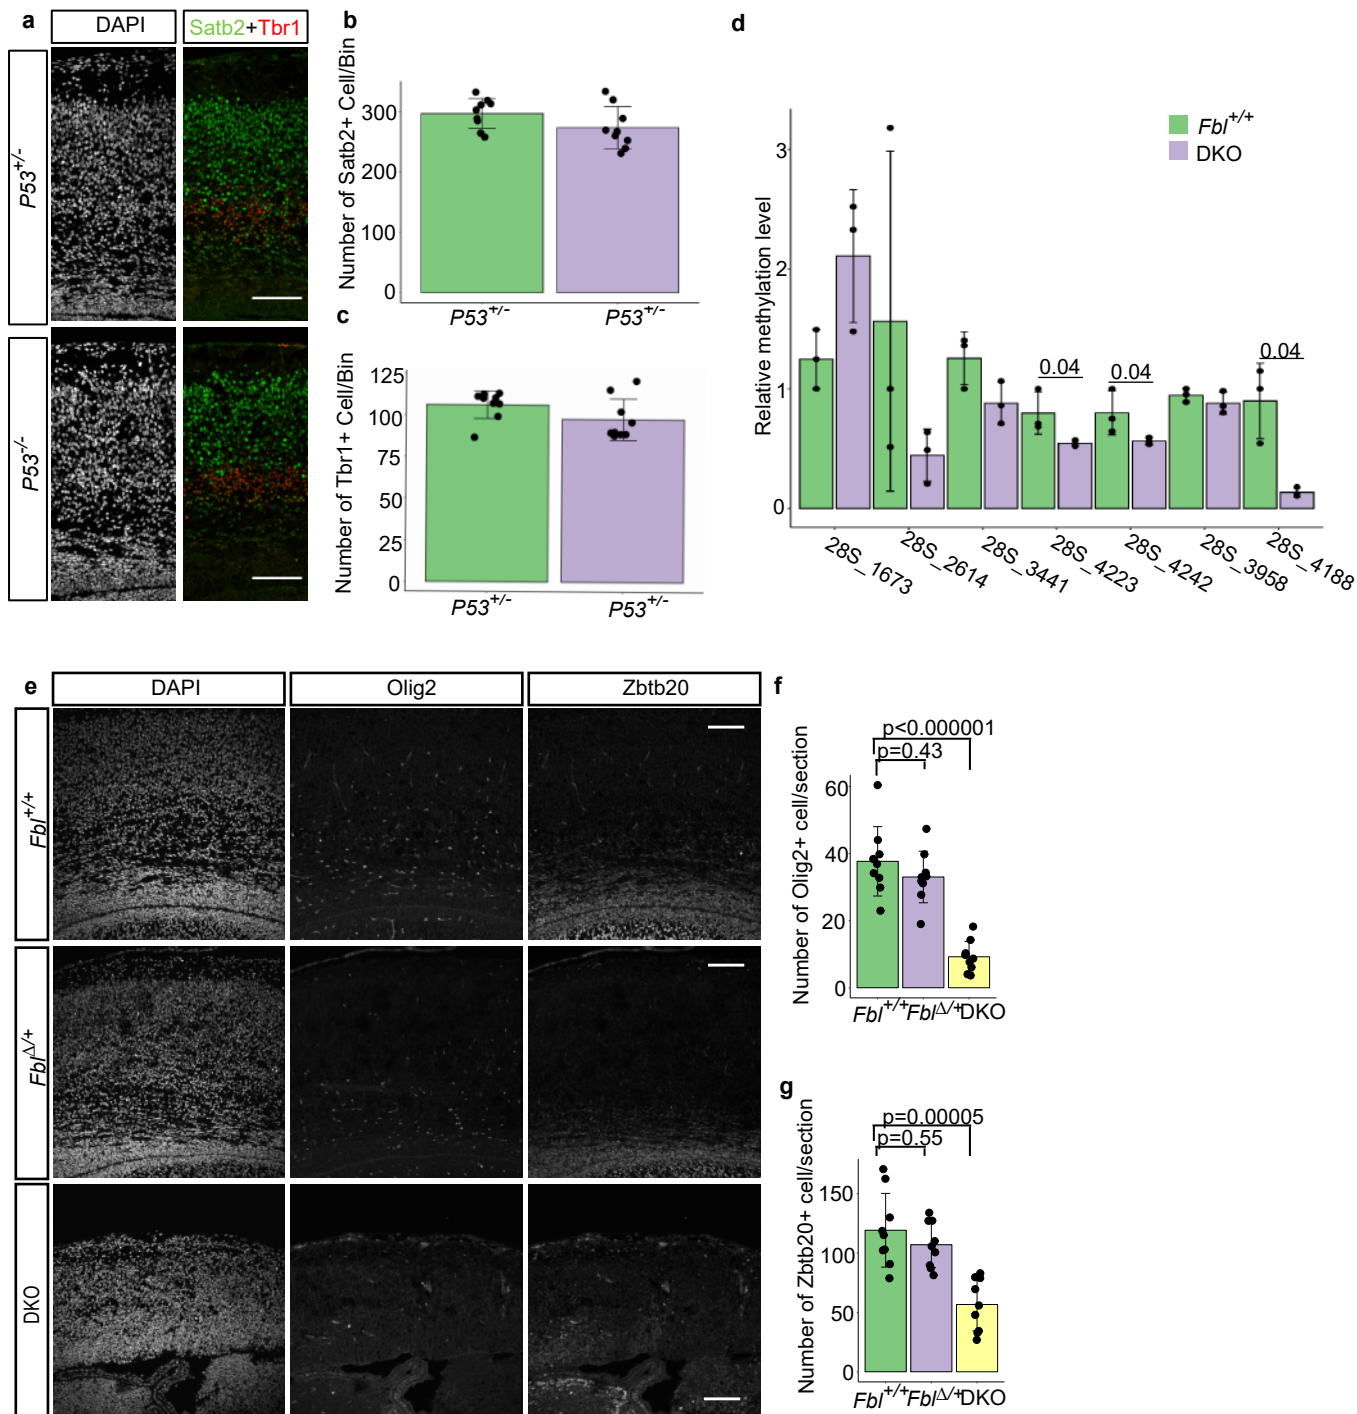

**Extended Data Fig.3 | Deletion of *Trp53* does not affect neurogenesis, while *Fbl* knockout affects methylation of rRNA, oligogenesis and astrocytogenesis.**

**a**, Representative image of *Trp53*<sup>+/+</sup> and *Trp53*<sup>-/-</sup> brain sections stained for Satb2 and Tbr1.

**b,c**, Cell number quantification on sections based on immunostaining with the indicated markers (n=3 mice per genotype, n=3 sections per mouse).

**d**, Methylation level at the indicated sites in *Fbl*<sup>+/+</sup> and DKO NSCs (one-sided Wilcoxon signed rank test; data are presented as mean±s.d).

**e**, Representative image of E17 brain section stained for Oligo2 and Zbtb20.

**f,g**, Quantification of cell number on sections basing on immunostaining with the indicated markers (n=3 mice per genotype, n=3 sections per mouse; one-way ANOVA followed by Tukey's post-hoc tests; data are presented as mean±s.d. of n=9 sections). Scale bar: 100 μm.

**Extended Data Fig.4**

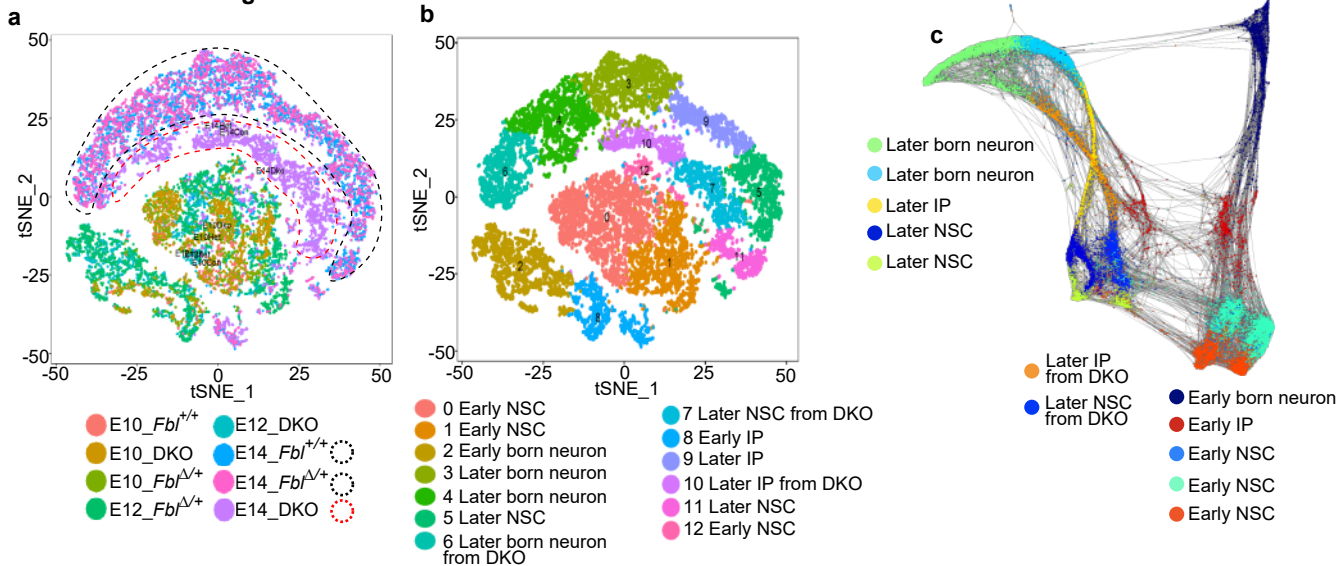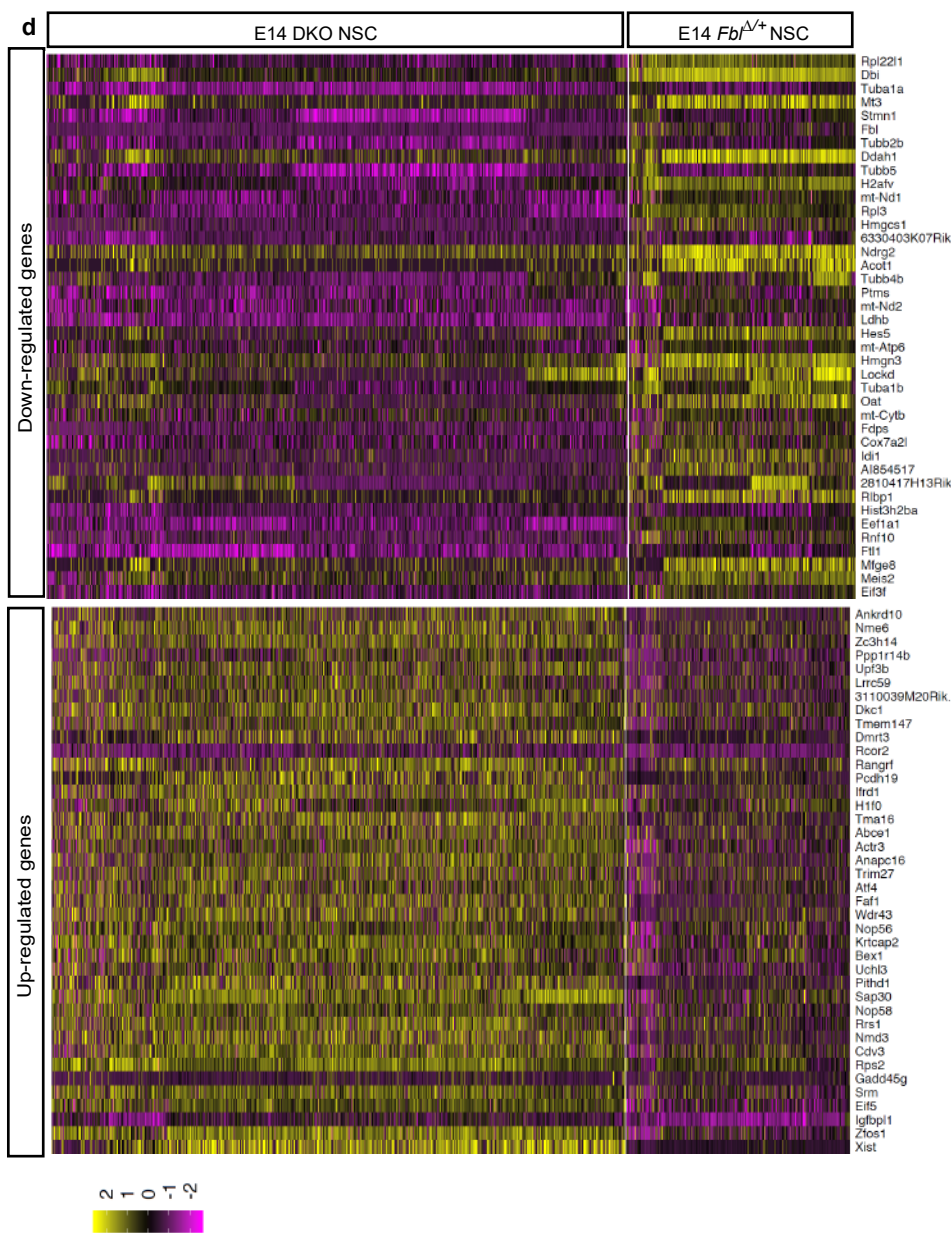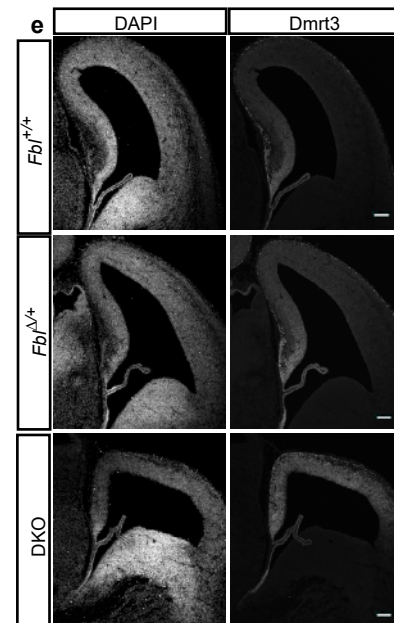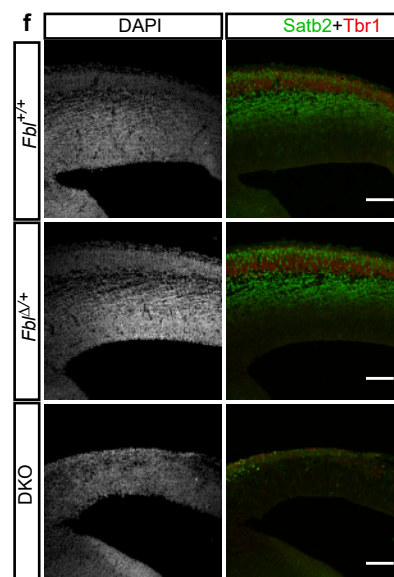

**Extended Data Fig.4 | Single-cell transcriptome analysis of temporal pattern in NSCs.**

**a,b**, Scatterplot of single-cell transcriptome after t-stochastic neighbour embedding (t-SNE), coloured by genotypes from different stages (a) or different cell types (b). In (a), the separation of E14 DKO brain cells from E14 *Fbl*<sup>+/+</sup> or *Fbl*<sup>Δ/+</sup> brain cells is emphasized by the dotted red and black circles, respectively.

**c**, SPRING graph of single cells colored by cell type identified by the expression of marker genes.

**d**, Heatmap of the top 40 differentially expressed genes in the comparison of E14 DKO and *Fbl*<sup>Δ/+</sup> NSCs, ranked by fold change.

**e,f**, Representative images of E14 brain sections stained for *Dmrt3* (e) and *Satb2/Tbr1* (f). Staining was performed in three different biological samples for each genotype. Scale bar: 100 μm.

**Extended Data Fig.5**

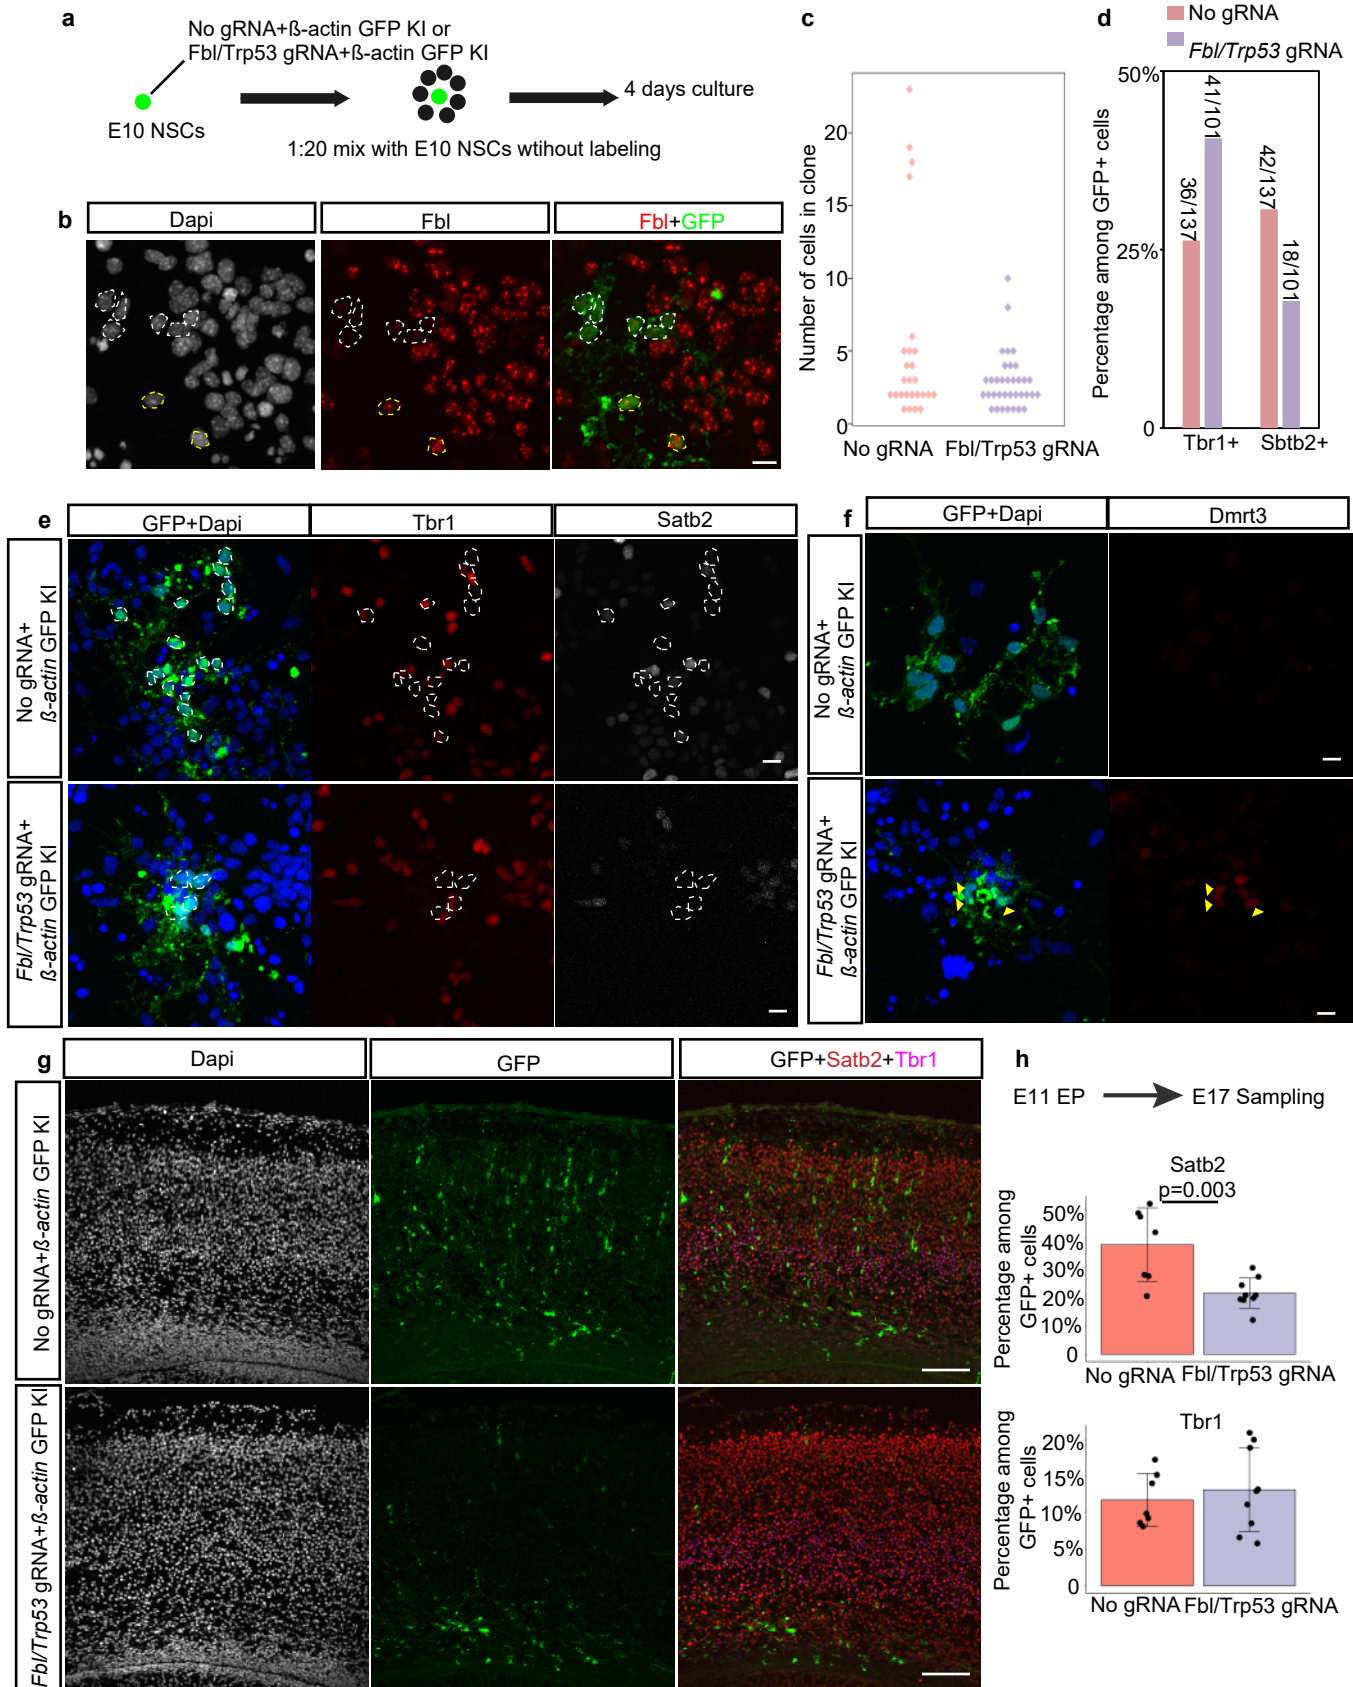

**Extended Data Fig.5 | Fbl works intrinsically for temporal pattern transition.**

- a**, Schematics of the experimental design for clonal analysis of *Fbl/Trp53*-null NSCs. Cells from dorsal brains were electroporated at E10 with/without *Fbl* and *Trp53* gRNA for deletion and with  $\beta$ -actin gRNA for labelling.
- b**, Representative image of cultured cells stained for Fbl showing deletion of Fbl in some GFP-positive cells (n=39/88). White and yellow circles indicate Fbl-negative and positive cells, respectively. Scale bar: 10  $\mu$ m
- c**, Clone size analysis of normal and *Fbl/Trp53*-null NSCs after 4 days of culture. (Clone number n=26 and n=35 for control and knockout, respectively, from two independent experiments)
- d**, Percentage of Tbr1- and Satb2-positive cells among GFP-positives based on staining. The number of counted cells is shown.
- e**, Representative image of cultured cells stained for GFP/Dapi, Tbr1, and Brn2. Scale bar: 10  $\mu$ m.
- f**, Representative image of cultured cells stained for GFP/Dapi and Dmrt3, showing more *Fbl/Trp53*-null cells (11/39) expressing Dmrt3 than control cells (2/34), which was also observed in *Fbl* DKO brains in Figure S4E. Scale bar: 10  $\mu$ m.
- g**, Representative image of E17 brain section stained for GFP, Tbr1, and Satb2. Dorsal brains were electroporated at E11 with/without *Fbl* and *Trp53* gRNA for deletion and  $\beta$ -actin gRNA for labelling. Scale bar: 100  $\mu$ m.
- h**, Quantification of Satb2- and Tbr1-positive cells on sections based on immunostaining (n=3 mice per genotype, n=2-3 sections per mouse; Student's t-test; data are presented as mean $\pm$ s.d. of counted sections).



**Extended Data Fig.6**

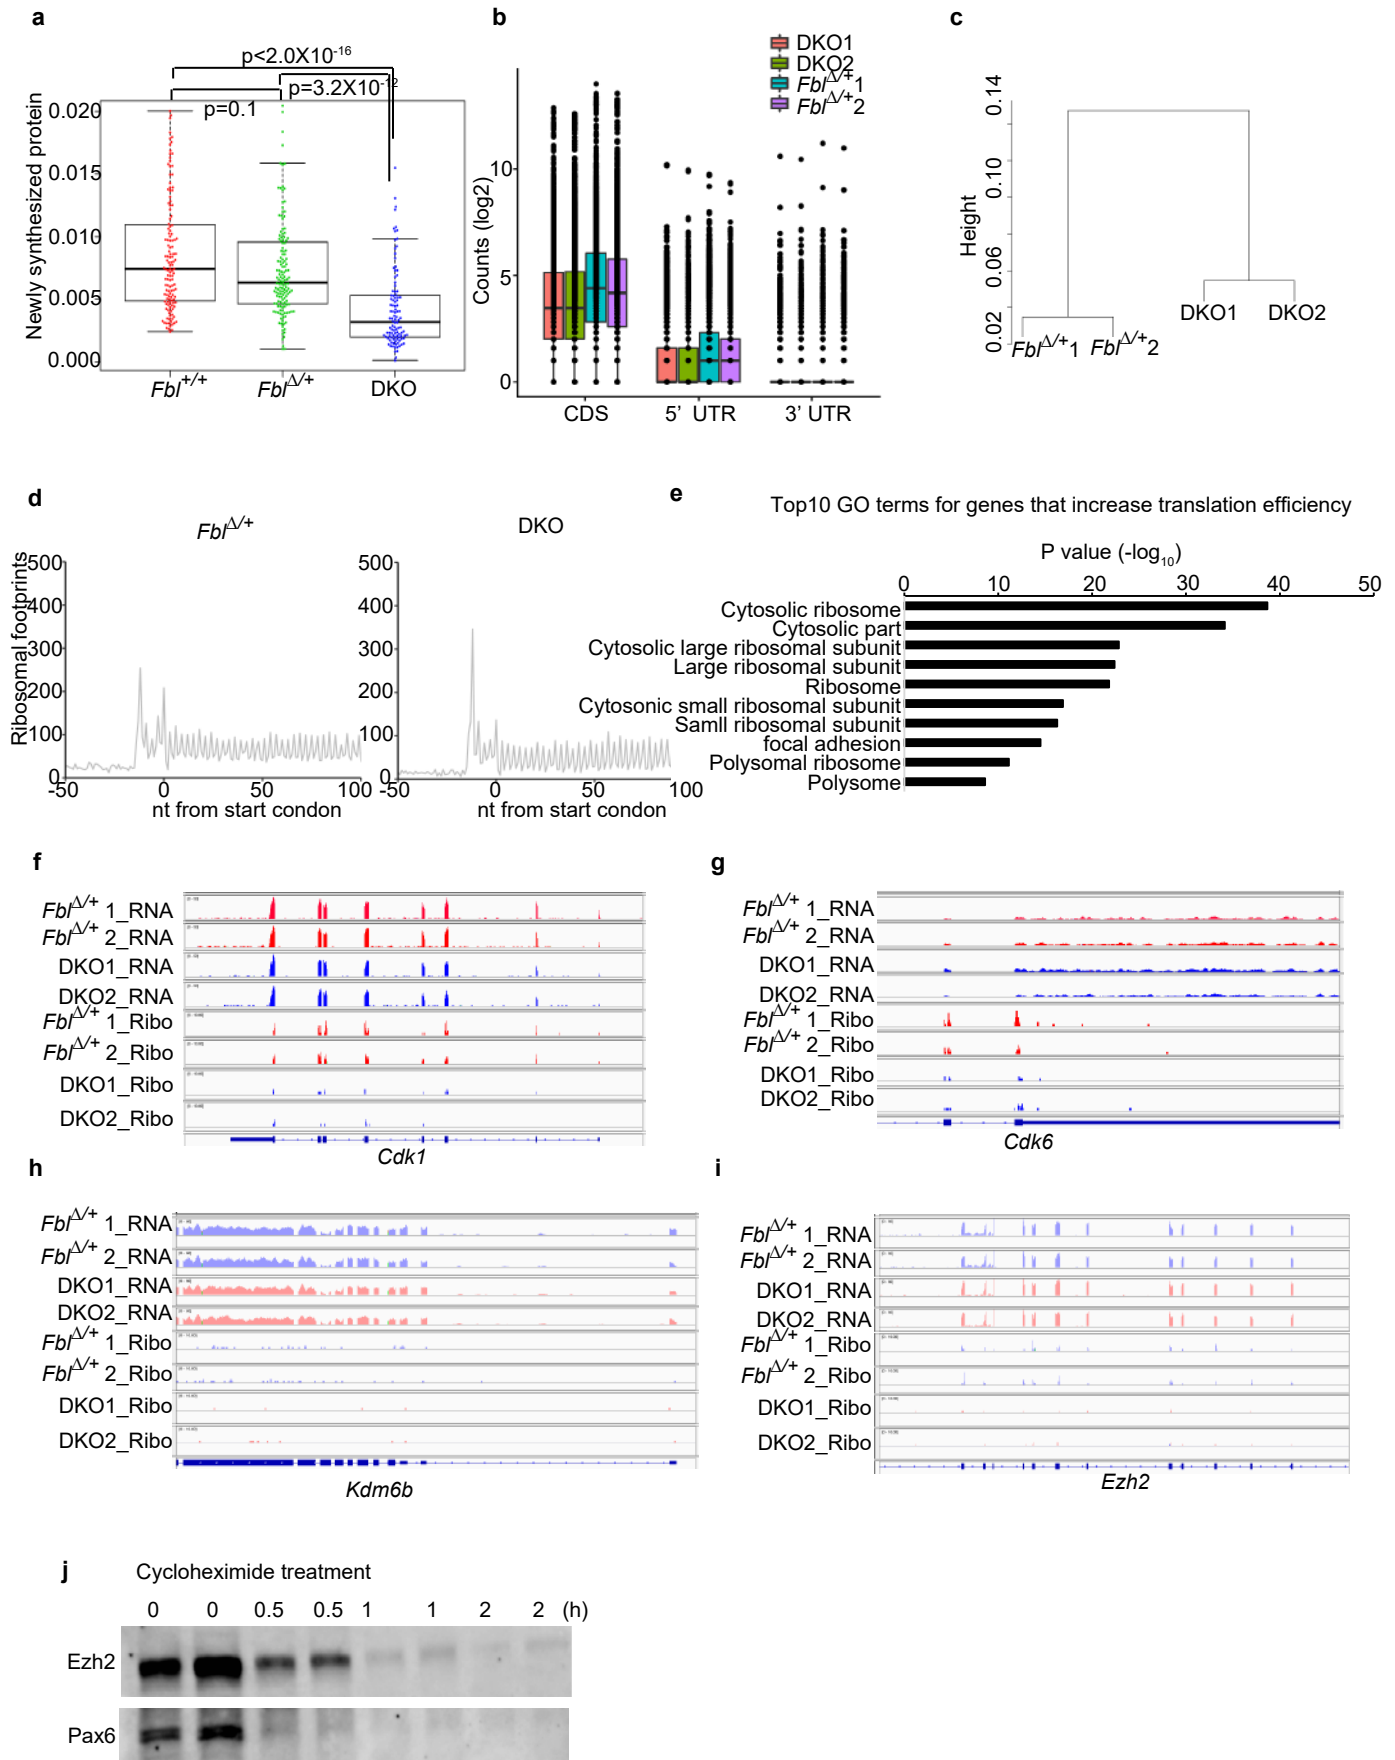

**Extended Data Fig.6 | Assessment of translational efficiency (TE) dependent on Fbl via ribosome profiling.**

- a**, Quantification of O-propargyl-puromycin (OPP) incorporation in NSCs (Kruskal-Wallis test and Dunn's test with Bonferroni correction; Fbl<sup>+/+</sup>: n=135; Fbl<sup>Δ/+</sup>: n=148; DKO: n=106).
- b**, Counts of ribosome footprints mapping on different mRNA regions.
- c**, Hierarchical clustering of ribosome profiling data.
- d**, Metagene analysis of the 5' end of footprints showing three-nucleotide periodicity of the ribosomal footprint reads.
- e**, Top 10 GO terms of transcripts whose TE increased after Fbl knockout.
- f-i**, Genome browser view of RNA-seq and Ribo-seq density of the indicated genes.
- j**, Western blot analysis of Ezh2 and Pax6 after treatment with 100 μg/ml cycloheximide for the indicated time, showing that Pax6 was not more stable than Ezh2 (n=2).



**Extended Data Fig.7 | Cap-independent translational activity in the 5'UTR of Fbl target mRNAs.**

**a**, Representative plot of sorting GFP and BFP populations using the 5'UTR of Pax6 and Ezh2.

**b**, qPCR of BFP and GFP from transfected cells indicates the same expression level of BFP and GFP (data are presented as mean $\pm$ s.d., n=3).

**c**, RT-PCR using primers in BFP and GFP confirms the absence of cryptic splices in the 5'UTR of Ezh2 and Kdm6b (n=3 each).

**d**, Quantitative analysis of BFP signal after Fbl knockdown (data are presented as mean $\pm$ s.d., n=3)

**e,f**, Detection of Ezh2 and Kdm6b protein by western blot after knockout of the 5'UTR of these genes.

**g,h**, Confirmation of the deletion of the 5'UTR of Ezh2 (g) and Kdm6b (h) by sequencing.
